# Supplementary material for: Generation, regeneration, and recovery of Cu catalytic system by changing the polarity of electrodes
Source: Royal Society of Chemistry journal article supplement (doi:10.1039/d1gc03975j), 2022-01-01
Supplement: d1gc03975j1.pdf [file d1gc03975j1.pdf]

**Supporting information**

**Generation, regeneration, and recovery of Cu catalytic system by  
changing the polarity of electrodes**

Konstantin S. Rodygin,<sup>a</sup> Dmitriy E. Samoylenko,<sup>a</sup> Marina M. Seitkalieva,<sup>b</sup> Kristina A. Lotsman,<sup>a</sup>  
Svetlana A. Metlyaeva,<sup>a</sup> and Valentine P. Ananikov\*<sup>a,b</sup>

<sup>a</sup>Saint Petersburg State University, Universitetskiy pr. 26, Stary Petergof 198504, Russia.

<sup>b</sup>N. D. Zelinsky Institute of Organic Chemistry, Russian Academy of Sciences, Leninsky pr. 47,  
Moscow 119991, Russia. E-mail: val@ioc.ac.ru.

## Contents

|                                                               |           |
|---------------------------------------------------------------|-----------|
| <b>S1. CV MEASUREMENTS .....</b>                              | <b>3</b>  |
| <b>S2. OPTIMIZATION EXPERIMENTS .....</b>                     | <b>7</b>  |
| <b>S3. NMR DATA AND CHARACTERIZATION .....</b>                | <b>10</b> |
| <b>S4. NMR SPECTRA .....</b>                                  | <b>13</b> |
| <b>S5. XRD DATA .....</b>                                     | <b>29</b> |
| <b>S6. SEM DATA .....</b>                                     | <b>30</b> |
| <b>S7. HRESI-MS DATA.....</b>                                 | <b>32</b> |
| <b>S8. SINGLE CRYSTAL X-RAY STRUCTURE DETERMINATION .....</b> | <b>33</b> |
| <b>S9. DETAILS ON ELECTROCHEMICAL EXPERIMENTS .....</b>       | <b>35</b> |
| <b>S10. REFERENCES .....</b>                                  | <b>39</b> |

### S1. CV measurements

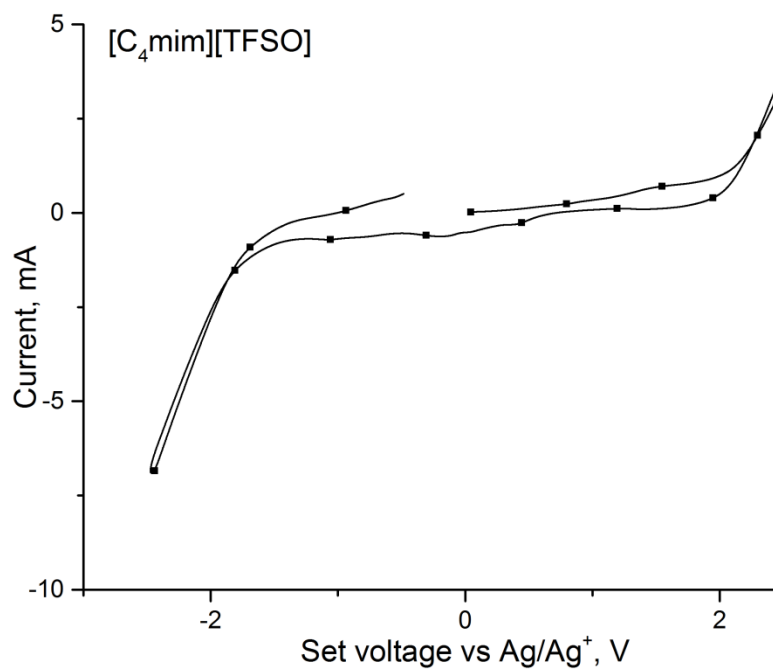

**Figure S1.** Cyclic voltammogram of [C<sub>4</sub>mim][TFSO].

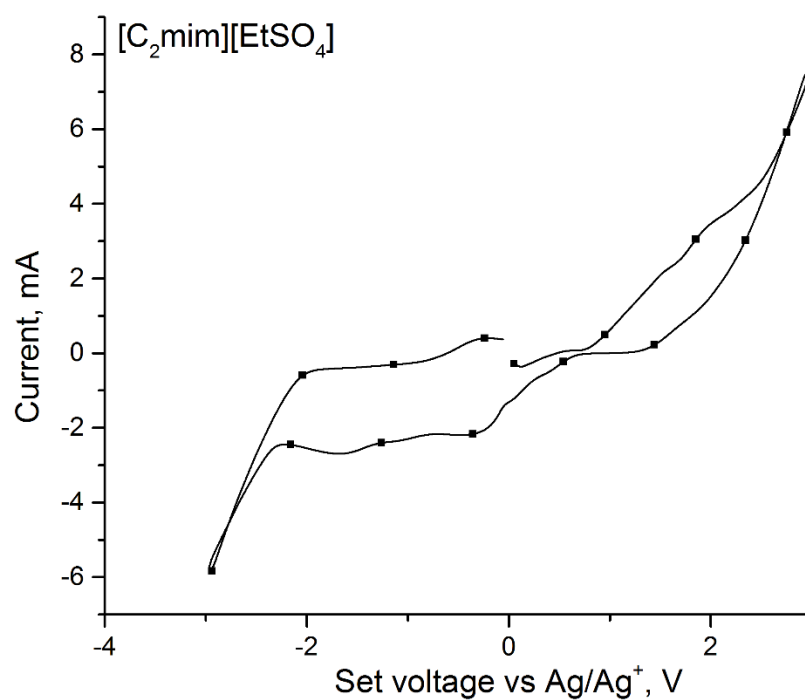

**Figure S2.** Cyclic voltammogram of [C<sub>2</sub>mim][EtSO<sub>4</sub>]

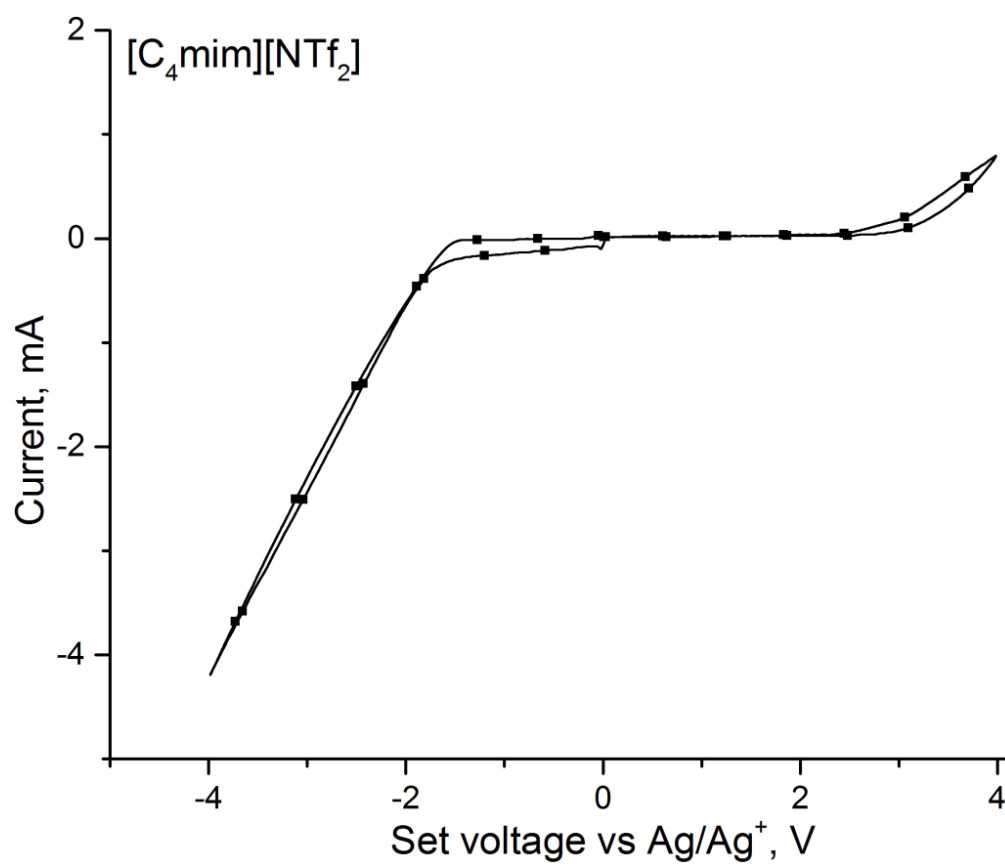

**Figure S3.** Cyclic voltammogram of [C<sub>4</sub>mim][NTf<sub>2</sub>]

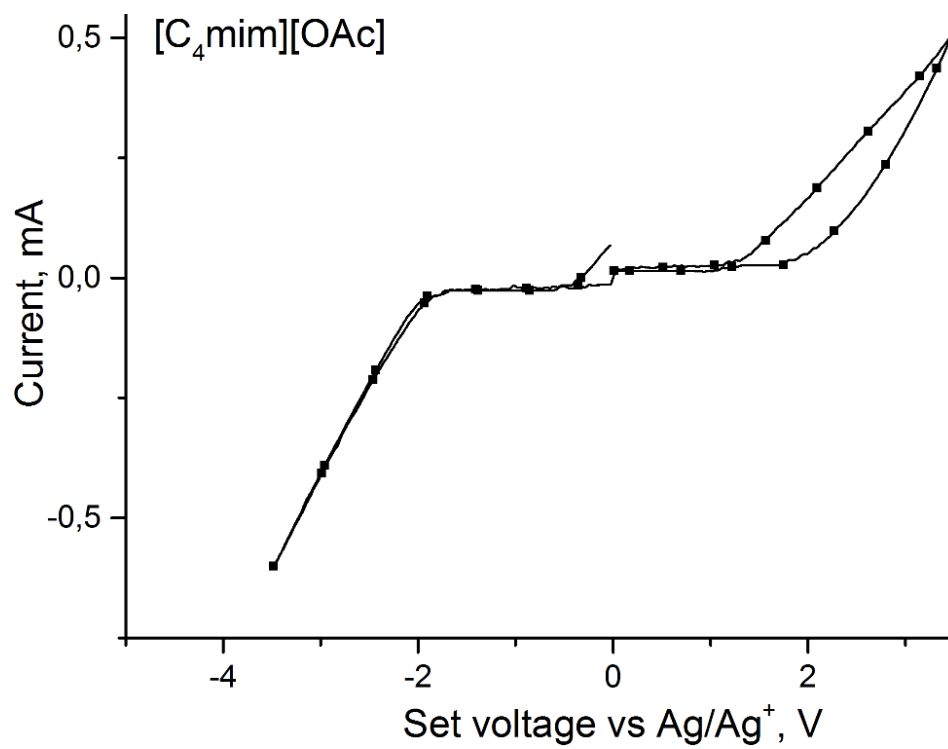

**Figure S4.** Cyclic voltammogram of [C<sub>4</sub>mim][OAc]

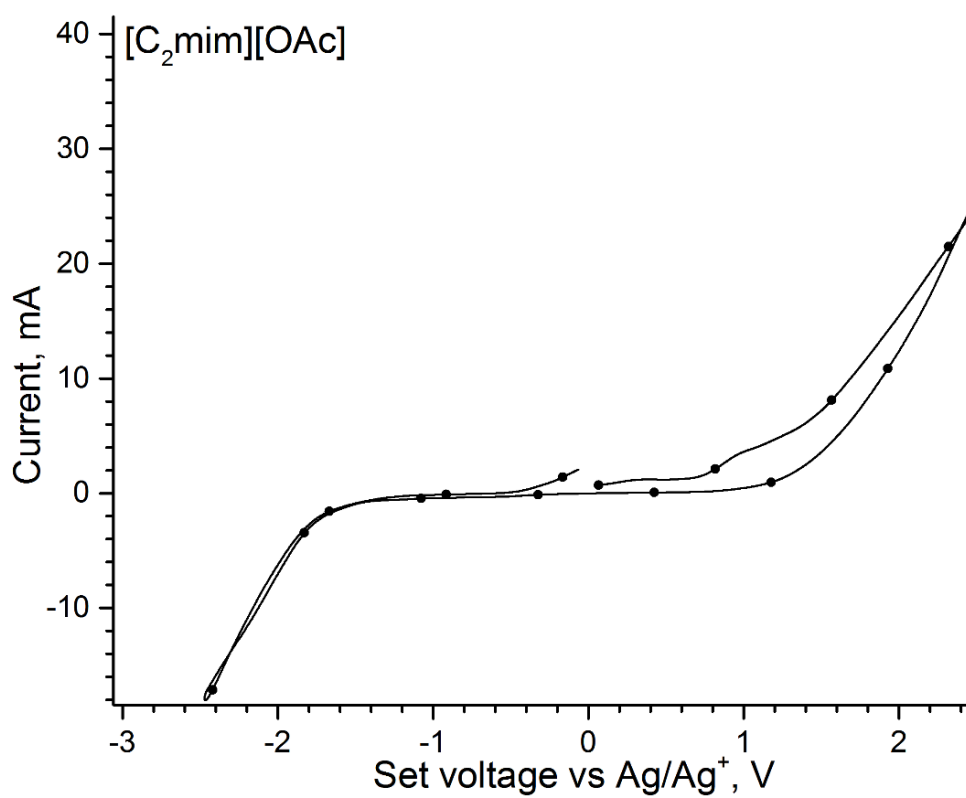

**Figure S5.** Cyclic voltammogram of [C<sub>2</sub>mim][OAc]

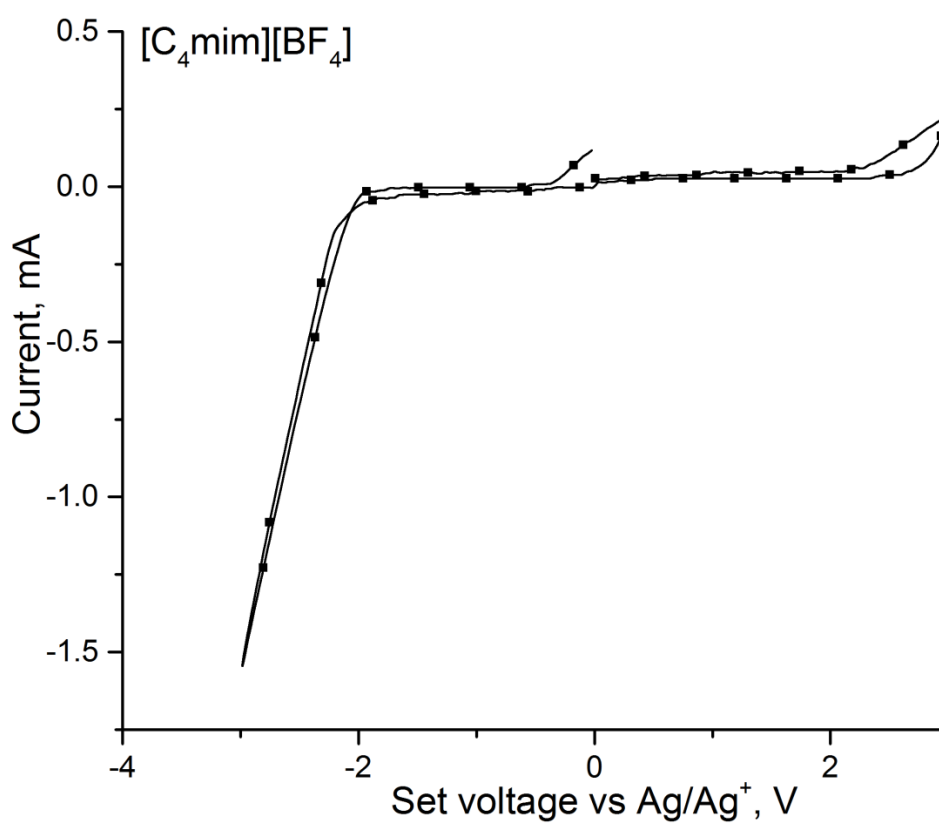

**Figure S6.** Cyclic voltammogram of [C<sub>4</sub>mim][BF<sub>4</sub>]

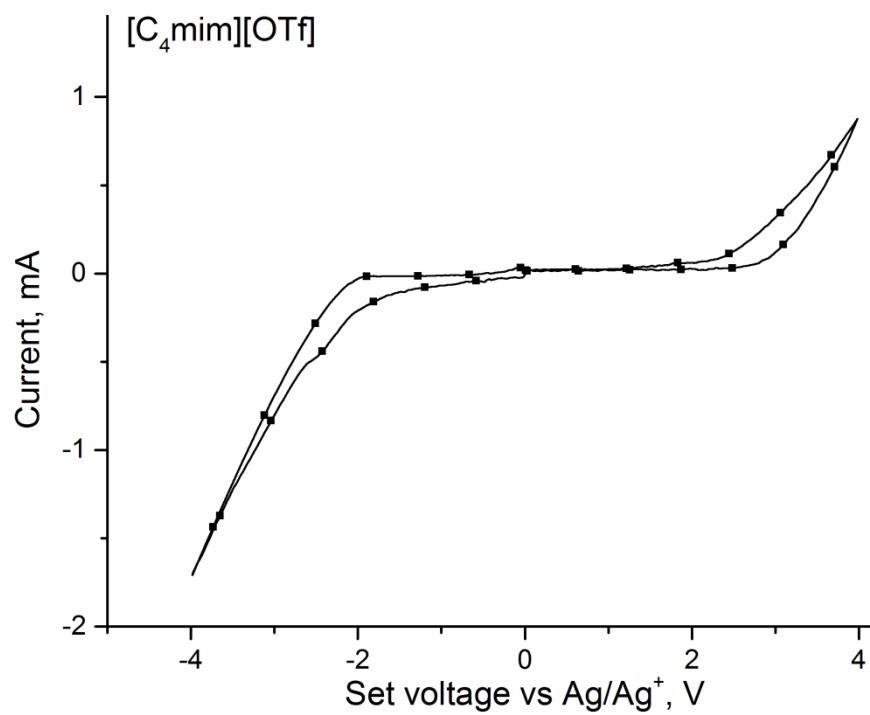

**Figure S7.** Cyclic voltammogram of [C<sub>4</sub>mim][OTf]

## S2. Optimization experiments

### Optimization of copper electrode dissolution in different ILs.

**Table S1.** Optimization of electrochemical dissolution of a copper electrode in ILs with C<sub>2</sub>mim<sup>+</sup> cation.

| № | IL                                       | V(H <sub>2</sub> O), vol% | t, h | I, mA | m(Cu), mg |
|---|------------------------------------------|---------------------------|------|-------|-----------|
| 1 | [C <sub>2</sub> mim][EtSO <sub>4</sub> ] | 0                         | 1.5  | 2     | 4.6       |
| 2 | [C <sub>2</sub> mim][OAc]                | 0                         | 1.5  | 2     | 1.2       |
| 3 | [C <sub>4</sub> mim][HSO <sub>4</sub> ]  | 0                         | 1.5  | 2     | 0         |
| 4 | [C <sub>2</sub> mim][EtSO <sub>4</sub> ] | 0                         | 1.5  | 0.2   | 0.7       |
| 5 | [C <sub>2</sub> mim][OAc]                | 5                         | 1    | 2     | 4.1       |
| 6 | [C <sub>2</sub> mim][OAc]                | 5                         | 1.5  | 2     | 5.8       |
| 7 | [C <sub>2</sub> mim][OAc]                | 10                        | 0.5  | 2     | 0.7       |
| 8 | [C <sub>2</sub> mim][OAc]                | 10                        | 1    | 2     | 4.1       |
| 9 | [C <sub>2</sub> mim][OAc]                | 10                        | 1.5  | 2     | 7.7       |

At the first stage, ILs were selected ([C<sub>2</sub>mim][EtSO<sub>4</sub>], [C<sub>2</sub>mim][OAc], [C<sub>4</sub>mim][HSO<sub>4</sub>]), in which the electrochemical dissolution of the copper electrode was carried out without the addition of water (Table S1, ent. 1–3). It was noted that the process proceeds better in IL based on 1-ethyl-3-methylimidazolium than in [C<sub>4</sub>mim][HSO<sub>4</sub>]. Since [C<sub>2</sub>mim][EtSO<sub>4</sub>] showed the best efficiency in dissolving copper, we tried to use this IL to change the direct current to 0.2 mA (Table S1, ent. 4). This led to a significant decrease in the amount of dissolved copper in the solution, so it was decided to conduct experiments with a current of 2 mA. Since [C<sub>2</sub>mim][EtSO<sub>4</sub>], [C<sub>2</sub>mim][OAc] also showed promising results in the dissolution of the copper electrode, we decided to use this IL to test the possibility of increasing the efficiency of copper dissolution by adding water into the system. As expected, already with the addition of 5 vol.% of water for 1 h, the efficiency of dissolving copper by electric current is comparable to that obtained with [C<sub>2</sub>mim][EtSO<sub>4</sub>] (Table S1, ent. 5). The higher the dissolution time, the much copper transferred to the solution (Table S1, entry 6). The addition of 10 vol.% also increases the efficiency of copper dissolution, and by varying the time, we were able to achieve the dissolution of 7.7 mg of copper in IL (Table S1, ent. 7-9).

**Table S2.** Optimization of anodic dissolution of a copper electrode in ILs with C<sub>4</sub>mim<sup>+</sup> cation\*.

| № | IL                                      | V(H <sub>2</sub> O), % | Ua, V     | m(Cu), g |
|---|-----------------------------------------|------------------------|-----------|----------|
| 1 | [C <sub>4</sub> mim][BF <sub>4</sub> ]  | 0                      | 2.4 – 2.5 | 0.0003   |
| 2 | [C <sub>4</sub> mim][BF <sub>4</sub> ]  | 5                      | 2.4       | 0.0009   |
| 3 | [C <sub>4</sub> mim][OTf]               | 0                      | 2.1       | 0.0015   |
| 4 | [C <sub>4</sub> mim][OTf]               | 5                      | 2.1       | 0.0016   |
| 5 | [C <sub>4</sub> mim][OAc]               | 0                      | 1.4       | 0.0019   |
| 6 | [C <sub>4</sub> mim][OAc]               | 5                      | 1.36      | 0.0011   |
| 7 | [C <sub>4</sub> mim][NTf <sub>2</sub> ] | 0                      | 2.4       | 0.0008   |
| 8 | [C <sub>4</sub> mim][NTf <sub>2</sub> ] | 5                      | 2.4       | 0.0006   |

\* Dissolution time is 2 h; current is 0.3 mA.

Without water the mass of dissolved copper varied from 0.3 mg ([C<sub>4</sub>mim][BF<sub>4</sub>]) to 1.9 mg ([C<sub>4</sub>mim][OAc]) (Table 1). When the 5 vol.% of water was added the mass of dissolved copper was changed. In case of [C<sub>4</sub>mim][BF<sub>4</sub>] the mass increases to 0.9 mg, whereas in other cases it did not change significantly ([C<sub>4</sub>mim][TfO] and [C<sub>4</sub>mim][NTf<sub>2</sub>]) or decreased to 1.1 mg ([C<sub>4</sub>mim][OAc]), compared to the conditions without added water. To obtain Cu-contained IL solution for C-S cross-coupling reactions the current was increased to 2 mA, which lead to an increase in the mass of released copper, similar to experiments in ILs with C<sub>2</sub>mim-cation.

**Table S3.** Optimization of ILs for C–S cross coupling reaction\*

| №  | IL                                      | V(H <sub>2</sub> O), vol.% | Conversion (%) |
|----|-----------------------------------------|----------------------------|----------------|
| 1. | [C <sub>4</sub> mim][BF <sub>4</sub> ]  | 0                          | 38             |
| 2. |                                         | 5                          | 29             |
| 3. | [C <sub>4</sub> mim][OTf]               | 0                          | 41             |
| 4. |                                         | 5                          | 15             |
| 5. | [C <sub>4</sub> mim][OAc]               | 0                          | <1             |
| 6. |                                         | 5                          | 7              |
| 7. | [C <sub>4</sub> mim][NTf <sub>2</sub> ] | 0                          | 12             |
| 8. |                                         | 5                          | 12             |

\*2 h, 110 °C

In 2 h the best results were achieved in [C<sub>4</sub>mim][BF<sub>4</sub>] and [C<sub>4</sub>mim][OTf] ILs. In the case of [C<sub>2</sub>mim][OTF] the product was not isolated due to good miscibility of the IL with common organic solvents for the extraction. Therefore, the reaction was carried out in [C<sub>4</sub>mim][BF<sub>4</sub>] IL with different amount of water for 24 h.

**Table S4.** Copper-catalyzed C–S cross coupling reaction optimization in [C<sub>4</sub>mim][BF<sub>4</sub>] IL.

| № | H <sub>2</sub> O, vol.% | t, h | Conversion, % |
|---|-------------------------|------|---------------|
| 1 | 0                       | 24   | 80            |
| 2 | 1                       | 24   | 85            |
| 3 | 5                       | 24   | 93            |
| 4 | 10                      | 24   | 90            |

1.2 eq. Cs<sub>2</sub>CO<sub>3</sub>, 5 mol.% Cu, 110 °C

The best results were obtained in a system with 5 vol.% of water.

*Calcium carbide in copper-promoted “click”-reaction.*



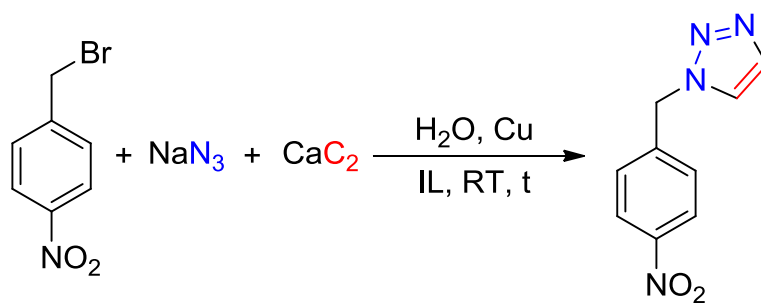

**Table S5.** Optimization of carbide-based synthesis of triazoles (**16-17**).

| No | IL                                       | t, h | C-electrode     | H <sub>2</sub> O, mL | Δm (Cu-electrode), mg | NMR yield, % |
|----|------------------------------------------|------|-----------------|----------------------|-----------------------|--------------|
| 1  | [C <sub>2</sub> mim][HSO <sub>4</sub> ]  | 2    | Stainless steel | 0.2                  | -                     | NR           |
| 2  | [C <sub>4</sub> mim][PF <sub>6</sub> ]   | 2    | Stainless steel | 0.2                  | 5.2                   | NR           |
| 3  | [C <sub>2</sub> mim][OAc]                | 2    | Stainless steel | 0.2                  | 4.9                   | NR           |
| 4  | [C <sub>4</sub> mim][BF <sub>4</sub> ]   | 2    | Stainless steel | 0.2                  | 2.8                   | 63           |
| 5  | [C <sub>4</sub> mpyr][BF <sub>4</sub> ]  | 2    | Stainless steel | 0.2                  | 6.1                   | 72           |
| 6  | [C <sub>2</sub> mim][EtSO <sub>4</sub> ] | 2    | Stainless steel | 0.2                  | 1.4                   | 93           |
| 7  | [C <sub>2</sub> mim][EtSO <sub>4</sub> ] | 3    | Graphite        | 0.2                  | 6.8                   | 99           |
| 8  | [C <sub>2</sub> mim][EtSO <sub>4</sub> ] | 3    | Pt              | 0.2                  | 5.0                   | 99           |
| 9  | [C <sub>2</sub> mim][EtSO <sub>4</sub> ] | 3    | Stainless steel | 0.2                  | 6.7                   | 99           |
| 10 | [C <sub>2</sub> mim][EtSO <sub>4</sub> ] | 3    | Stainless steel | 0.1                  | 6.6                   | 99           |
| 11 | [C <sub>2</sub> mim][EtSO <sub>4</sub> ] | 3    | Stainless steel | 0.03                 | 7.2                   | 76           |

### S3. NMR data and characterization

#### *1,4-diphenyl-1H-1,2,3-triazole (1)*

<sup>1</sup>H NMR (400 MHz, DMSO-*d*<sub>6</sub>) δ 9.30 (s, 1H), 7.96 (m, 4H), 7.64 (t, *J* = 7.9 Hz, 2H), 7.58 – 7.44 (m, 3H), 7.44 – 7.32 (m, 1H). <sup>13</sup>C NMR (101 MHz, DMSO-*d*<sub>6</sub>) δ 147.3, 136.6, 130.2, 129.9, 129.0, 128.7, 128.2, 125.3, 120.0, 119.6.

#### *4-phenyl-1-(p-tolyl)-1H-1,2,3-triazole (2)*

<sup>1</sup>H NMR (400 MHz, DMSO-*d*<sub>6</sub>) δ 9.24 (s, 1H), 8.00 – 7.88 (m, 2H), 7.83 (d, *J* = 8.3 Hz, 2H), 7.50 (t, *J* = 7.57 Hz, 2H), 7.43 (d, *J* = 8.12, 2H), 7.38 (t, *J* = 7.38, 1H), 2.39 (s, 3H). <sup>13</sup>C NMR (101 MHz, DMSO-*d*<sub>6</sub>) δ 147.2, 138.3, 134.4, 130.3, 130.2, 129.0, 128.1, 125.3, 119.8, 119.4, 20.6.

#### *4-phenyl-1-(m-tolyl)-1H-1,2,3-triazole (3)*

<sup>1</sup>H NMR (400 MHz, DMSO-*d*<sub>6</sub>) δ 9.27 (s, 1H), 8.01 – 7.87 (m, 2H), 7.80 (s, 1H), 7.75 (d, *J* = 8.0 Hz, 1H), 7.50 (m, 3H), 7.38 (t, *J* = 7.4 Hz, 1H), 7.33 (d, *J* = 7.6 Hz, 1H), 2.44 (s, 3H). <sup>13</sup>C NMR (101 MHz, DMSO-*d*<sub>6</sub>) δ 147.2, 139.6, 136.6, 130.3, 129.7, 129.3, 129.0, 128.2, 125.3, 120.4, 119.5, 117.1, 20.9.

#### *4-phenyl-1-(4-chlorophenyl)-1H-1,2,3-triazole (4)*

<sup>1</sup>H NMR (400 MHz, DMSO-*d*<sub>6</sub>) δ 9.34 (s, 1H), 8.01 (d, *J* = 8.8 Hz, 2H), 7.98 – 7.90 (m, 2H), 7.72 (d, *J* = 8.85 Hz, 2H), 7.52 (t, *J* = 7.7 Hz, 2H), 7.44 – 7.37 (m, 1H). <sup>13</sup>C NMR (101 MHz, DMSO-*d*<sub>6</sub>) δ 147.4, 135.4, 133.0, 130.1, 129.9, 129.0, 128.3, 125.3, 121.7, 119.7.

#### *4-phenyl-1-(3,4-dichlorophenyl)-1H-1,2,3-triazole (5)*

<sup>1</sup>H NMR (400 MHz, DMSO-*d*<sub>6</sub>) δ 9.40 (s, 1H), 8.31 (d, *J* = 2.5 Hz, 1H), 8.02 (dd, *J* = 8.7, 2.6 Hz, 1H), 7.93 (d, *J* = 7.5 Hz, 3H), 7.52 (t, *J* = 7.6 Hz, 2H), 7.40 (t, *J* = 7.4 Hz, 1H). <sup>13</sup>C NMR (101 MHz, DMSO) δ 147.5, 132.4, 131.9, 131.0, 129.9, 129.0, 128.4, 125.3, 121.6, 120.0, 119.9.

#### *4-phenyl-1-(4-fluorophenyl)-1H-1,2,3-triazole (6)*

<sup>1</sup>H NMR (400 MHz, DMSO-*d*<sub>6</sub>) δ 9.27 (s, 1H), 8.04 – 7.97 (m, 2H), 7.97 – 7.91 (m, 2H), 7.54 – 7.46 (m, 4H), 7.44 – 7.35 (m, 1H). <sup>13</sup>C NMR (101 MHz, DMSO-*d*<sub>6</sub>) δ 161.6 (d, *J* = 245.8 Hz), 147.3, 133.2 (d, *J* = 3.0 Hz), 130.2, 129.0, 128.2, 125.3, 122.3 (d, *J* = 8.8 Hz, 2C), 119.9, 116.8 (d, *J* = 23.3 Hz, 2C).

#### *4-phenyl-1-(2,4,6-trimethylphenyl)-1H-1,2,3-triazole (7)*

<sup>1</sup>H NMR (400 MHz, CDCl<sub>3</sub>) δ 7.98 – 7.88 (m, 2H), 7.83 (s, 1H), 7.52 – 7.42 (m, 2H), 7.42 – 7.32 (m, 1H), 7.01 (s, 2H), 2.37 (s, 3H), 2.02 (s, 6H). <sup>13</sup>C NMR (101 MHz, CDCl<sub>3</sub>) δ 147.7, 140.2, 135.3, 133.7, 130.7, 129.3, 129.1, 128.4, 125.9, 121.6, 21.3, 17.5.

#### *4-phenyl-1-(3-methoxyphenyl)-1H-1,2,3-triazole (8)*

<sup>1</sup>H NMR (400 MHz, DMSO-*d*<sub>6</sub>) δ 9.31 (s, 1H), 8.04 – 7.87 (m, 2H), 7.60 – 7.45 (m, 5H), 7.43 – 7.34 (m, 1H), 7.08 (dt, *J* = 6.8, 2.3 Hz, 1H), 3.88 (s, 3H). <sup>13</sup>C NMR (101 MHz, DMSO-*d*<sub>6</sub>) δ 160.2, 147.2, 137.6, 130.8, 130.2, 128.9, 128.2, 125.3, 119.6, 114.3, 111.9, 105.6, 55.6.

***4-n-hexyl-1-(p-tolyl)-1H-1,2,3-triazole (9)***

<sup>1</sup>H NMR (400 MHz, DMSO-*d*<sub>6</sub>) δ 8.49 (s, 1H), 7.74 (d, *J* = 8.5 Hz, 2H), 7.36 (d, *J* = 8.1 Hz, 2H), 2.67 (t, *J* = 7.6 Hz, 2H), 2.36 (s, 3H), 1.65 (quint, *J* = 7.4 Hz, 2H), 1.41 – 1.19 (m, 6H), 0.85 (t, *J* = 6.9 Hz, 3H). <sup>13</sup>C NMR (101 MHz, DMSO-*d*<sub>6</sub>) δ 148.0, 137.7, 134.6, 130.1, 119.8, 119.6, 31.0, 28.8, 28.3, 25.0, 22.0, 20.5, 13.9.

***4-n-pentyl-1-(4-chlorophenyl)-1H-1,2,3-triazole (10)***

<sup>1</sup>H NMR (400 MHz, DMSO-*d*<sub>6</sub>) δ 8.59 (s, 1H), 7.92 (d, *J* = 8.8 Hz, 2H), 7.64 (d, *J* = 8.9 Hz, 2H), 2.69 (t, *J* = 7.6 Hz, 2H), 1.66 (quint, *J* = 7.3 Hz, 2H), 1.32 (m, 4H), 0.88 (t, *J* = 7.1 Hz, 3H). <sup>13</sup>C NMR (101 MHz, DMSO-*d*<sub>6</sub>) δ 148.3, 135.6, 132.5, 129.7, 121.3, 120.1, 30.8, 28.4, 24.9, 21.8, 13.8. HRMS (*m/z*): [M-H]<sup>+</sup> calcd. for C<sub>13</sub>H<sub>17</sub>N<sub>3</sub>Cl, 250.1106; found, 250.1106

***1-(4-nitrophenyl)-1H-1,2,3-triazole (11)***

Since the reaction ended with the formation of undividable mixture, the spectrum was not defined.

***4-phenyl-1-(4-nitrobenzyl)-1H-1,2,3-triazole (12)***

<sup>1</sup>H NMR (400 MHz, DMSO-*d*<sub>6</sub>) δ 8.69 (s, 1H), 8.25 (d, *J* = 8.8 Hz, 2H), 7.90 – 7.81 (m, 2H), 7.58 (d, *J* = 8.8 Hz, 2H), 7.44 (t, *J* = 7.7 Hz, 2H), 7.33 (t, *J* = 7.4 Hz, 1H), 5.85 (s, 2H). <sup>13</sup>C NMR (101 MHz, DMSO-*d*<sub>6</sub>) δ 147.2, 146.8, 143.3, 130.5, 128.9, 128.9, 127.9, 125.2, 123.9, 121.9, 52.1.

***2-(1-(4-nitrobenzyl)-1H-1,2,3-triazol-4-yl)propan-2-ol (13)***

<sup>1</sup>H NMR (400 MHz, CDCl<sub>3</sub>) δ 8.22 (d, *J* = 8.7 Hz, 2H), 7.44 (s, 1H), 7.41 (d, *J* = 8.7 Hz, 1H), 5.61 (s, 2H), 2.56 (s, 1H), 1.62 (s, 6H). <sup>13</sup>C NMR (101 MHz, CDCl<sub>3</sub>) δ 156.7, 148.2, 141.8, 128.8, 124.4, 119.5, 68.7, 53.2, 30.6 HRMS (*m/z*): [M-H]<sup>+</sup> calcd., 263.1139; found, 263.1137.

***1-(4-nitrobenzyl)-4-hexyl-1H-1,2,3-triazole (14)***

<sup>1</sup>H NMR (400 MHz, CDCl<sub>3</sub>) δ 8.22 (d, *J* = 8.1 Hz, 2H), 7.38 (d, *J* = 8.5 Hz, 2H), 7.25 (s, 1H), 5.61 (s, 2H), 2.71 (t, *J* = 7.7 Hz, 2H), 1.69 – 1.61 (m, 2H), 1.37 – 1.20 (m, 6H), 0.85 (t, *J* = 6.52 Hz, 3H).

***1-(4-nitrobenzyl)-4-pentyl-1H-1,2,3-triazole (15)***

<sup>1</sup>H NMR (400 MHz, CDCl<sub>3</sub>) δ 8.20 (d, *J* = 8.7 Hz, 2H), 7.39 (s, *J* = 8.6 Hz, 2H), 7.26 (s, 1H), 5.60 (s, 2H), 2.70 (t, *J* = 7.74 Hz, 2H), 1.65 (quint, *J* = 7.4 Hz, 2H), 1.37 – 1.28 (m, 4H), 0.87 (t, *J* = 6.14 Hz, 3H).

***1-(4-nitrobenzyl)-1H-1,2,3-triazole (16)***

<sup>1</sup>H NMR (400 MHz, CDCl<sub>3</sub>) δ 8.21 (d, *J* = 8.7 Hz, 2H), 7.76 (s, 1H), 7.58 (s, 1H), 7.39 (d, *J* = 8.7 Hz, 2H), 5.69 (s, 2H). <sup>13</sup>C NMR (101 MHz, CDCl<sub>3</sub>) δ 148.2, 141.9, 134.8, 128.6, 124.4, 123.8, 53.0.

**1-benzyl-1H-1,2,3-triazole (17)**

<sup>1</sup>H NMR (400 MHz, CDCl<sub>3</sub>) δ 7.67 (s, 1H), 7.47 (s, 1H), 7.41 – 7.27 (m, 3H), 7.27 – 7.19 (m, 2H), 5.53 (s, 2H). <sup>13</sup>C NMR (101 MHz, CDCl<sub>3</sub>) δ 134.8, 134.3, 129.1, 128.8, 128.0, 123.4, 54.0.

**4-methoxyphenyl phenyl sulfide (yellow oil) (18)**

<sup>1</sup>H NMR (300 MHz, DMSO-*d*<sub>6</sub>) δ 7.41 (2H, m), 7.30 (2H, m), 7.10 – 7.22 (3H, m), 7.01 (2H, m), 3.78 (3H, s).

## S4. NMR spectra

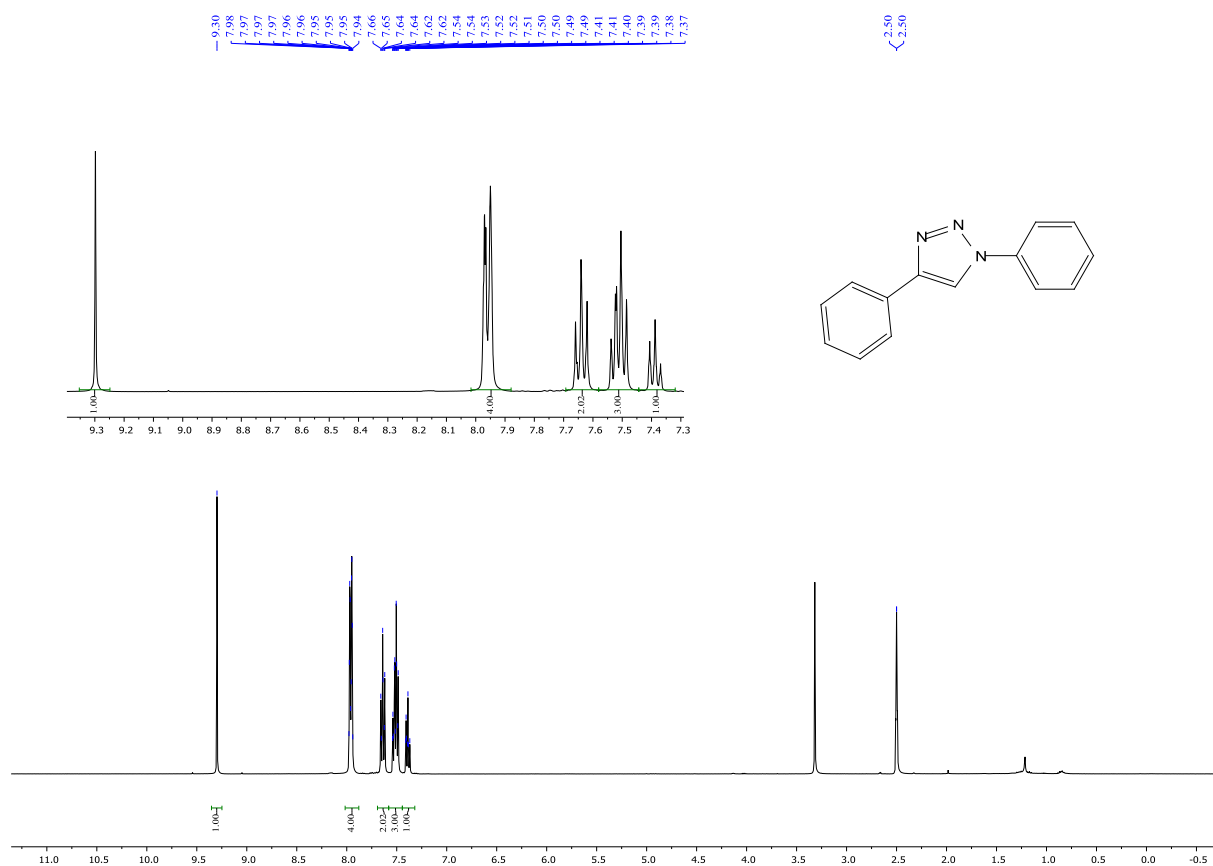

**Figure S8.** <sup>1</sup>H NMR (400 MHz, DMSO-*d*<sub>6</sub>) spectrum of 1,4-diphenyl-1*H*-1,2,3-triazole (**1**)

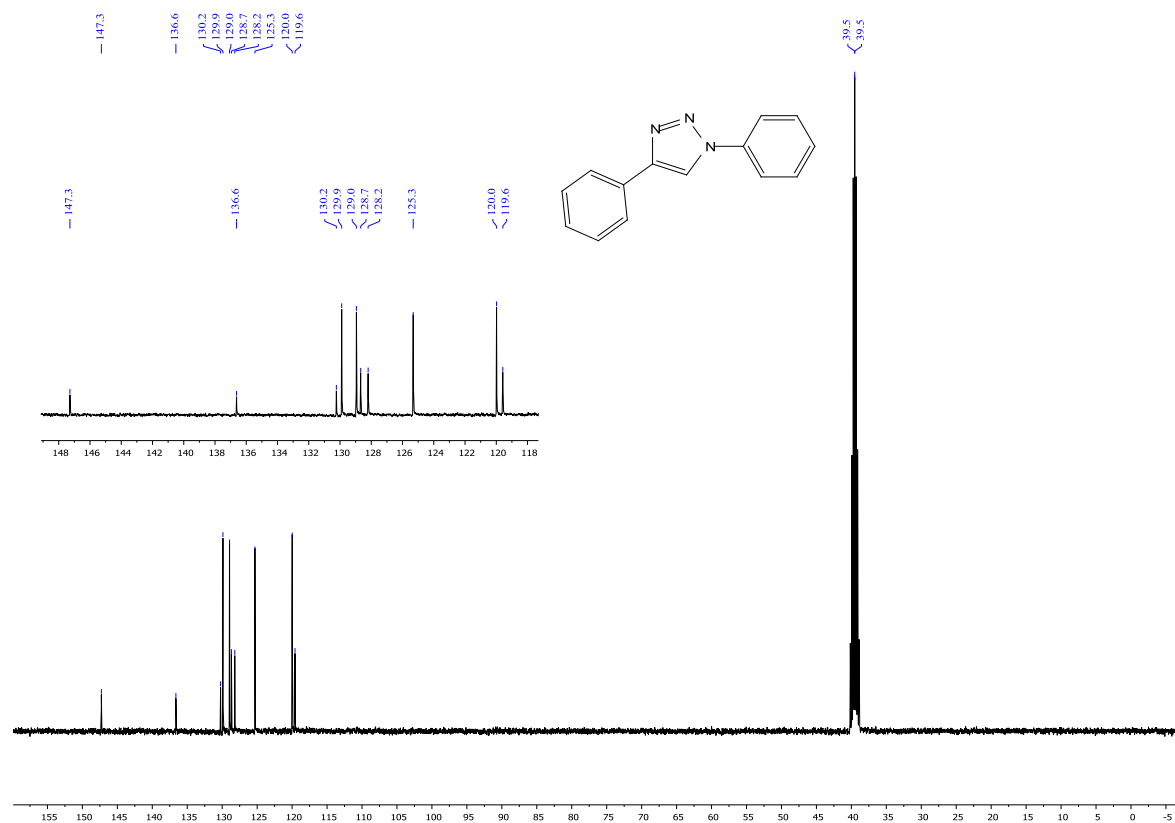

**Figure S9.** <sup>13</sup>C NMR (101 MHz, DMSO-*d*<sub>6</sub>) spectrum of 1,4-diphenyl-1*H*-1,2,3-triazole (**1**)

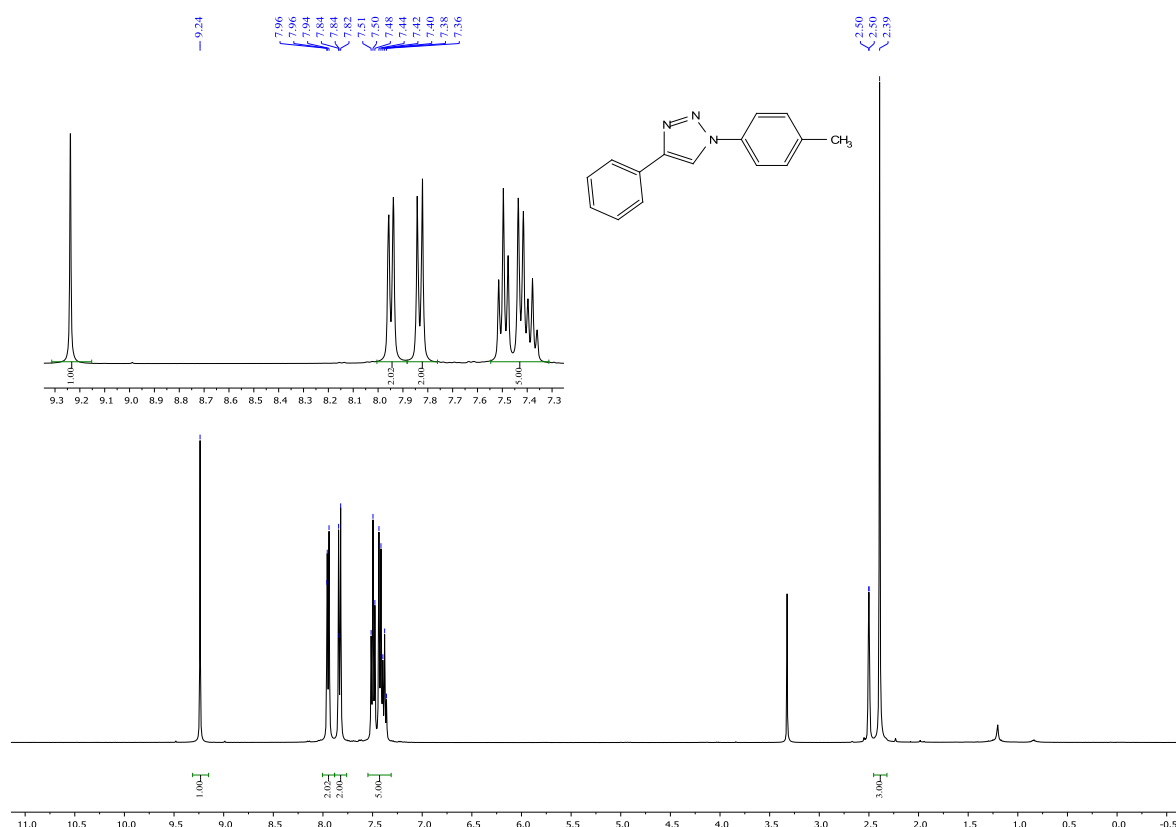

**Figure S10.** <sup>1</sup>H NMR spectrum (400 MHz, DMSO-*d*<sub>6</sub>) of 4-phenyl-1-(*p*-tolyl)-1*H*-1,2,3-triazole (2)

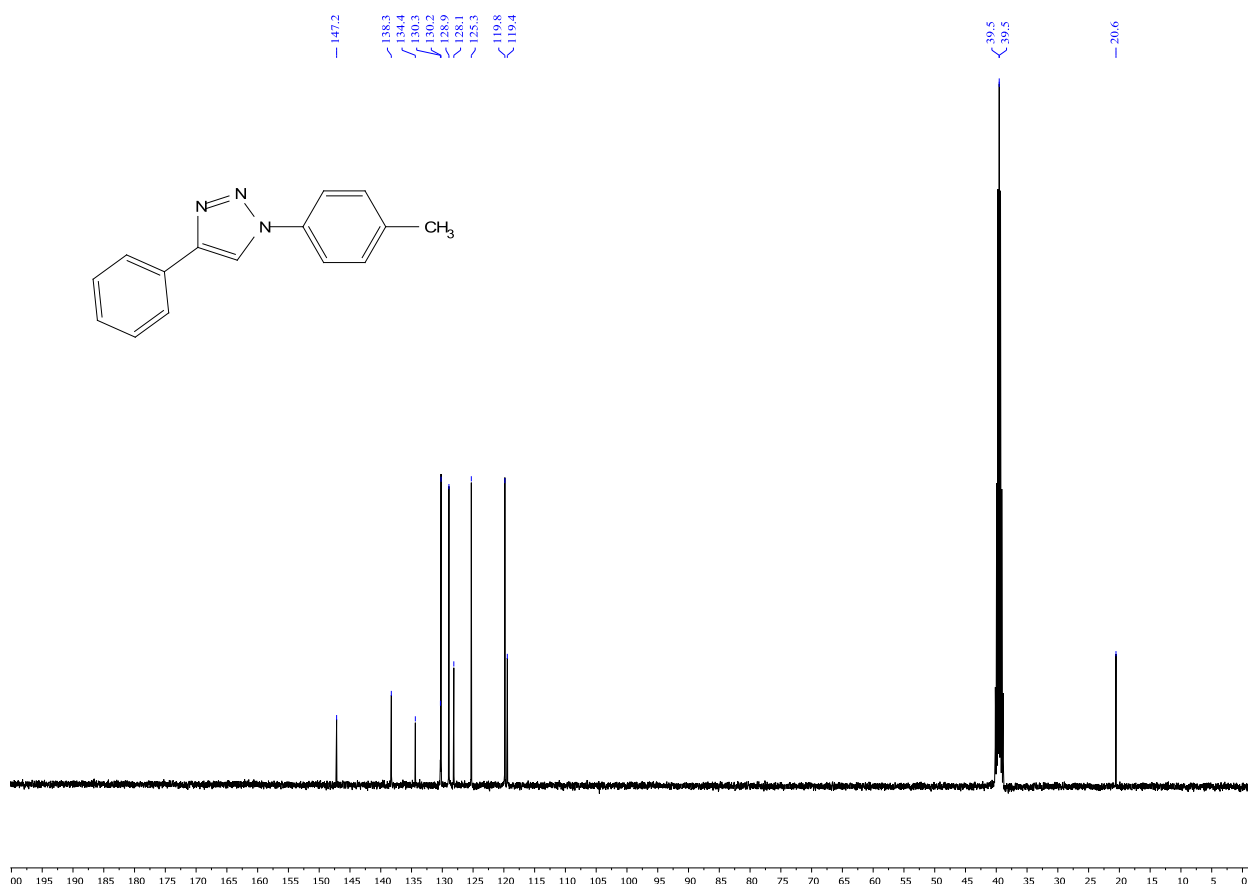

**Figure S11.** <sup>13</sup>C NMR (101 MHz, DMSO-*d*<sub>6</sub>) spectrum of 4-phenyl-1-(*p*-tolyl)-1*H*-1,2,3-triazole (2)

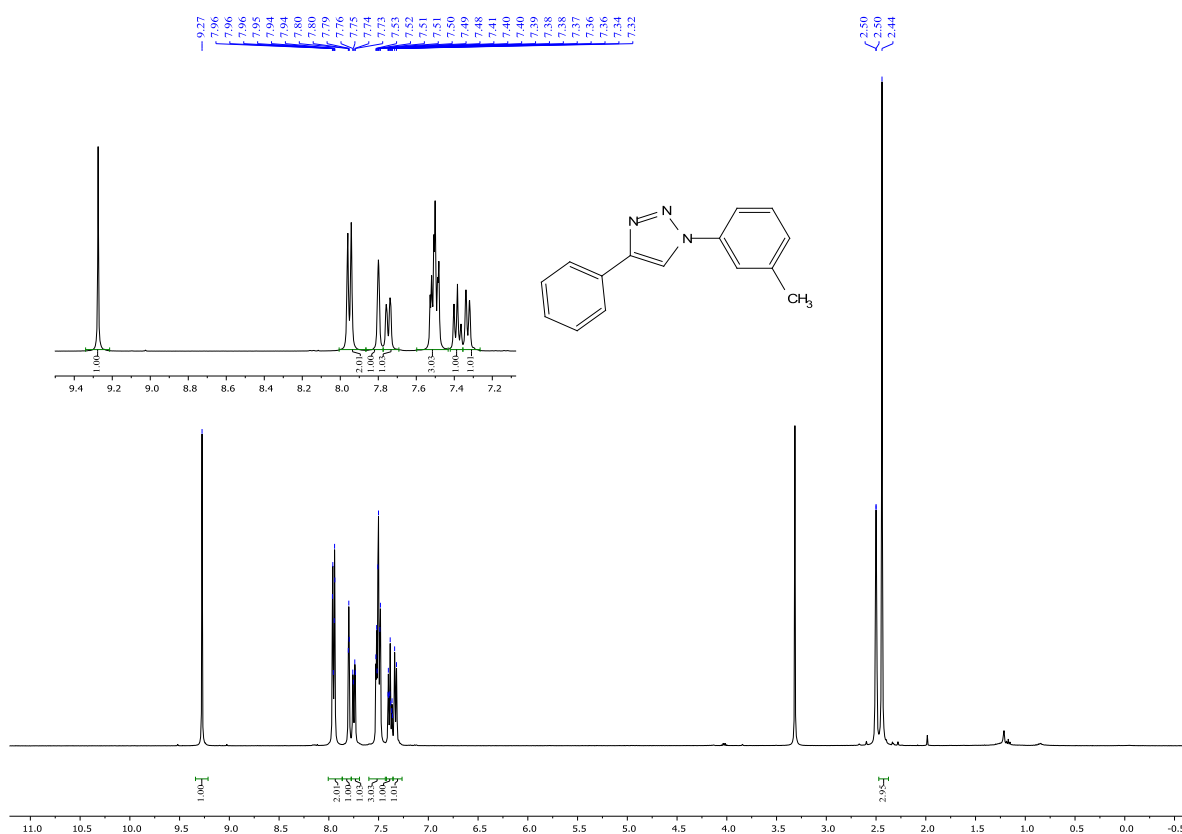

**Figure S12.** <sup>1</sup>H NMR (400 MHz, DMSO-*d*<sub>6</sub>) spectrum of 4-phenyl-1-(*m*-tolyl)-1*H*-1,2,3-triazole (3)

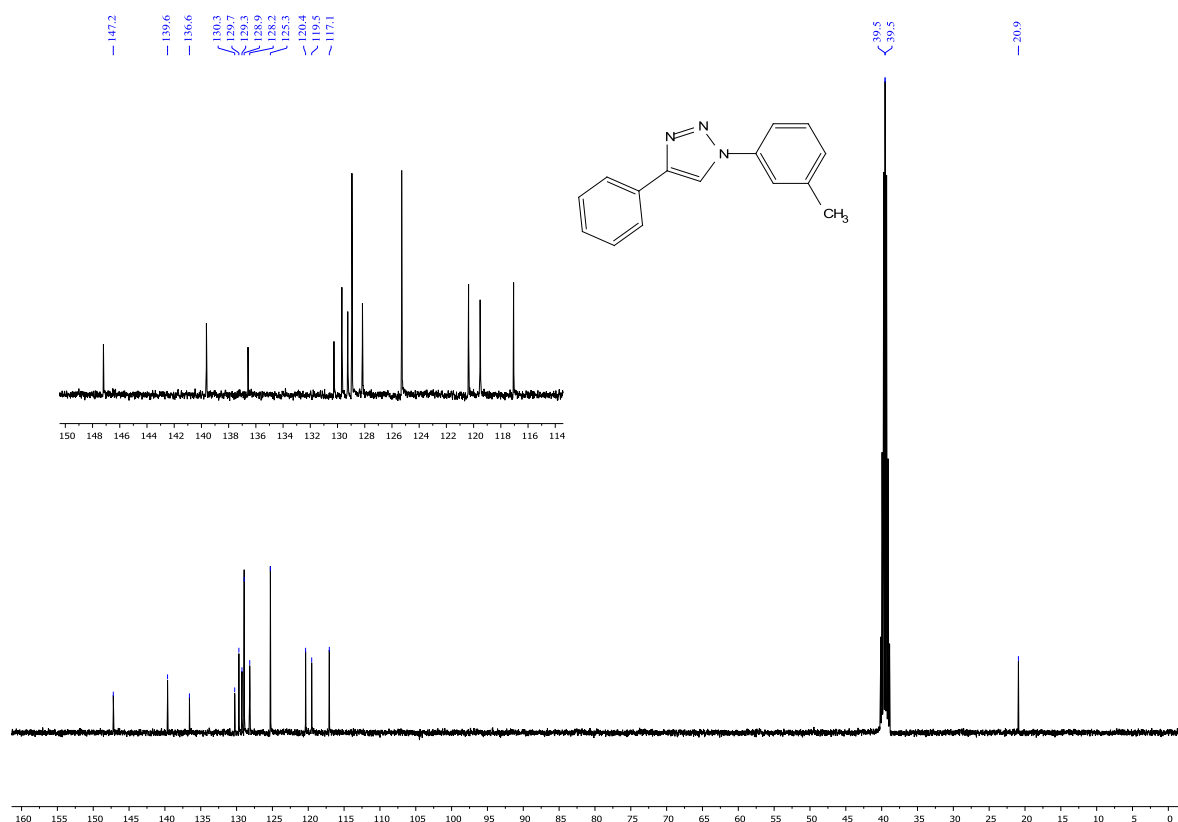

**Figure S13.** <sup>13</sup>C NMR (101 MHz, DMSO-*d*<sub>6</sub>) spectrum of 4-phenyl-1-(*m*-tolyl)-1*H*-1,2,3-triazole (3)

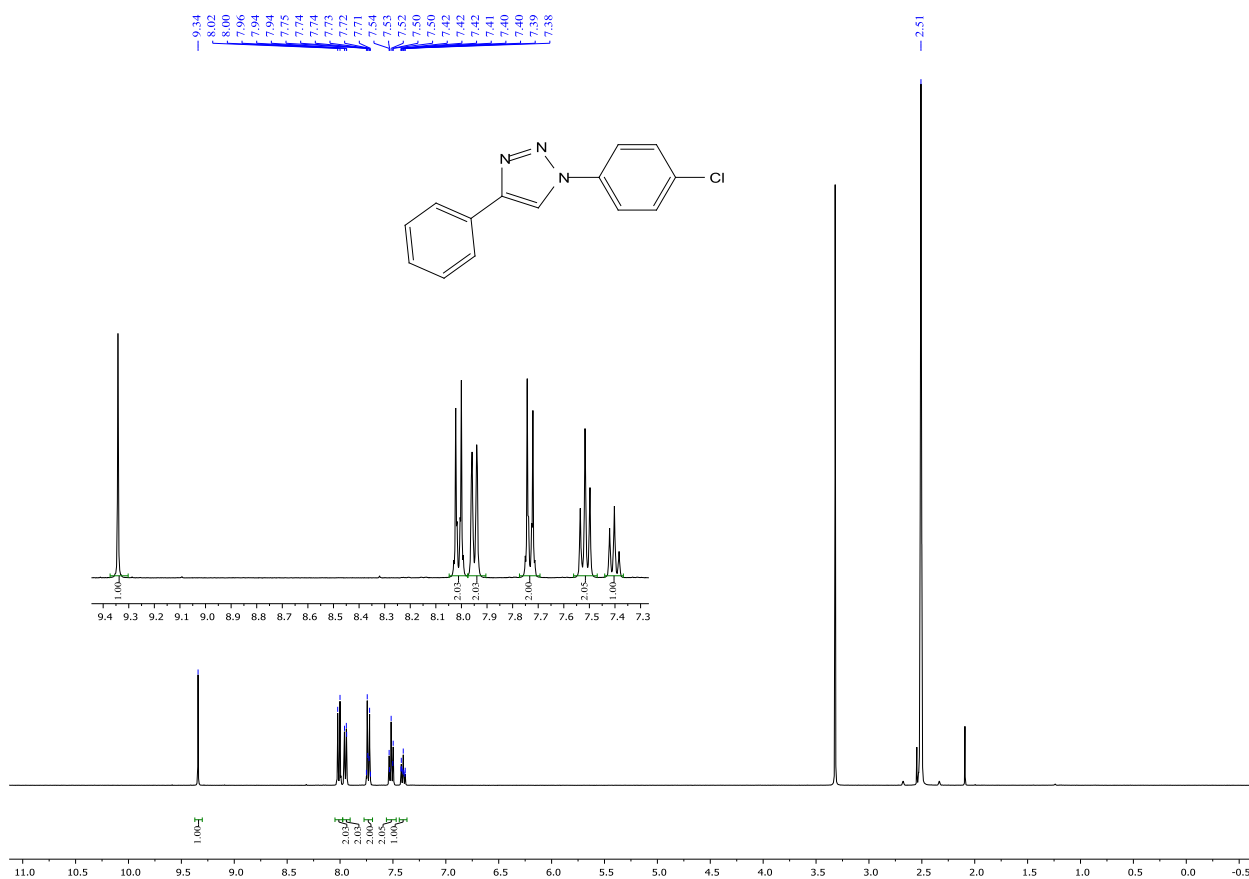

**Figure S14.** <sup>1</sup>H NMR (400 MHz, DMSO-*d*<sub>6</sub>) spectrum of 1-(4-chlorophenyl)-4-phenyl-1*H*-1,2,3-triazol (**4**)

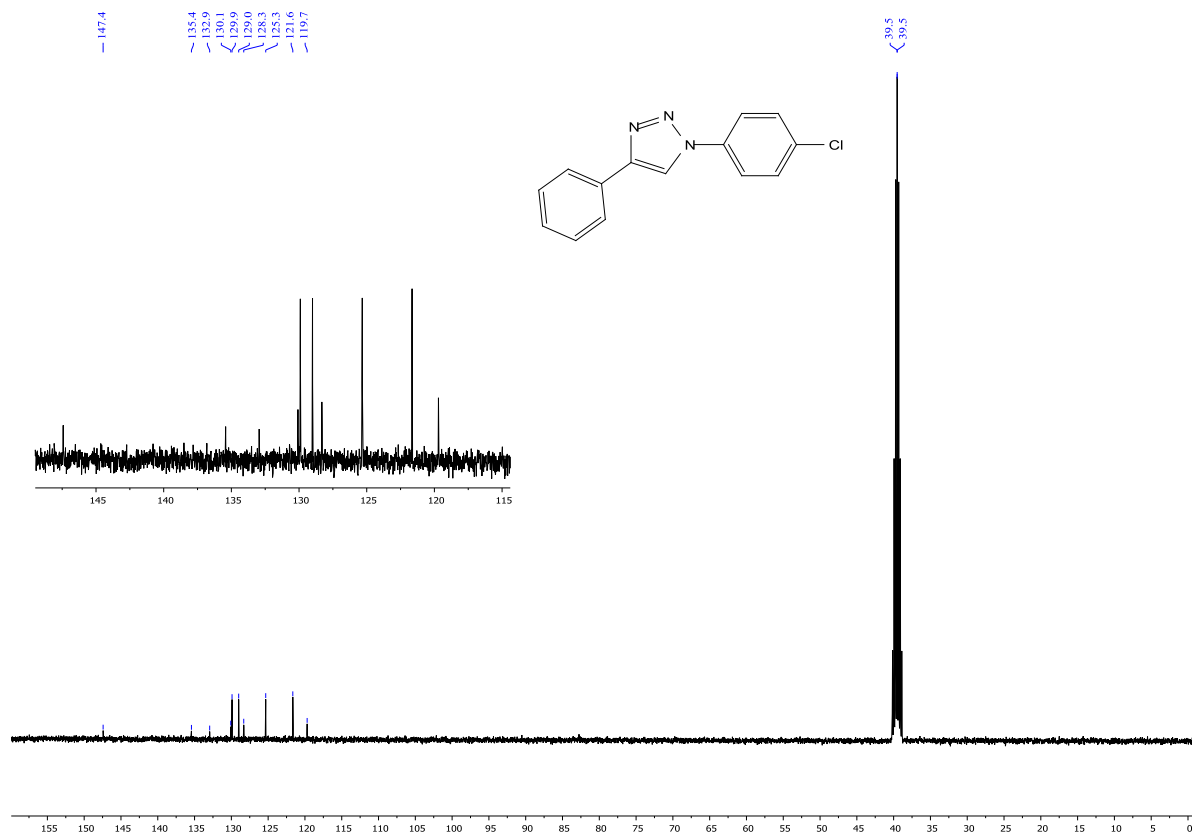

**Figure S15.** <sup>13</sup>C NMR (101 MHz, DMSO-*d*<sub>6</sub>) spectrum of 1-(4-chlorophenyl)-4-phenyl-1*H*-1,2,3-triazol (**4**)



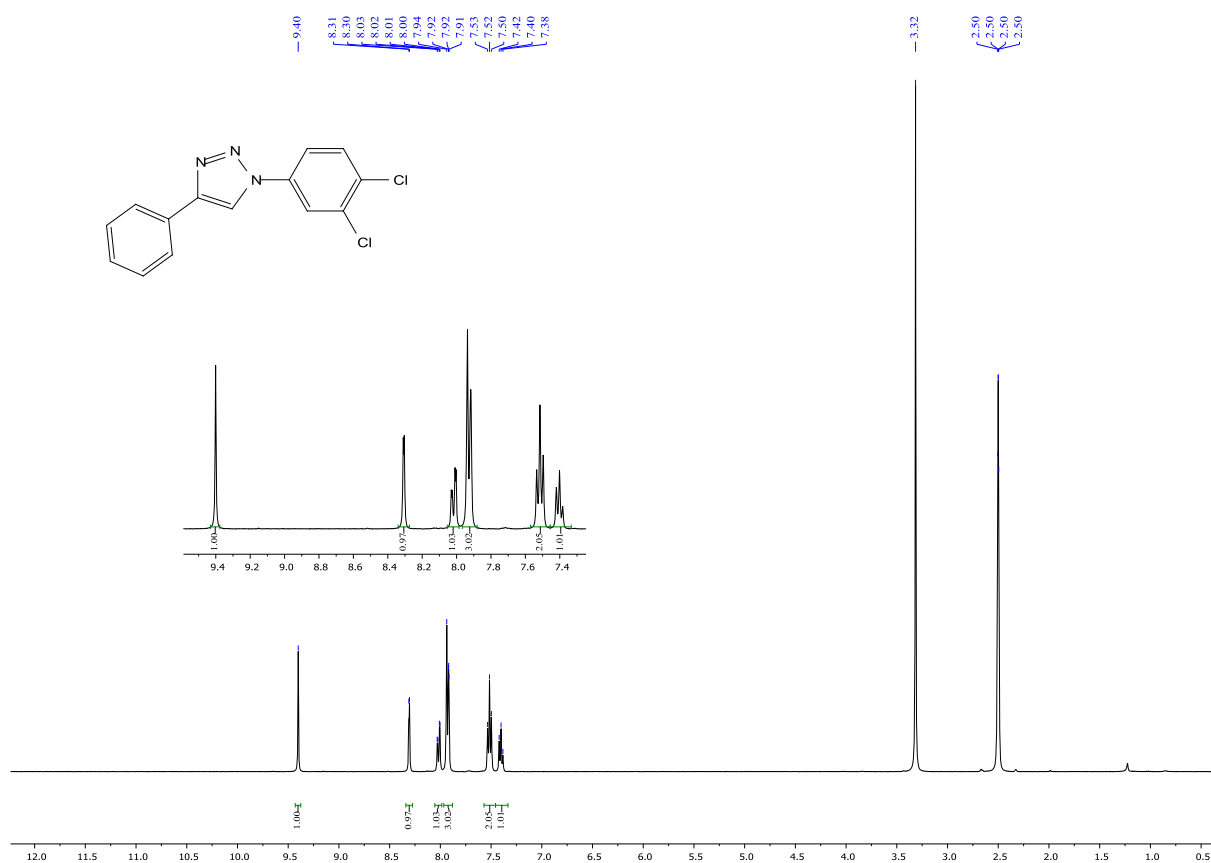

**Figure S16.** <sup>1</sup>H NMR (400 MHz, DMSO-*d*<sub>6</sub>) spectrum of 4-phenyl-1-(3,4-dichlorophenyl)-1*H*-1,2,3-triazole (**5**)

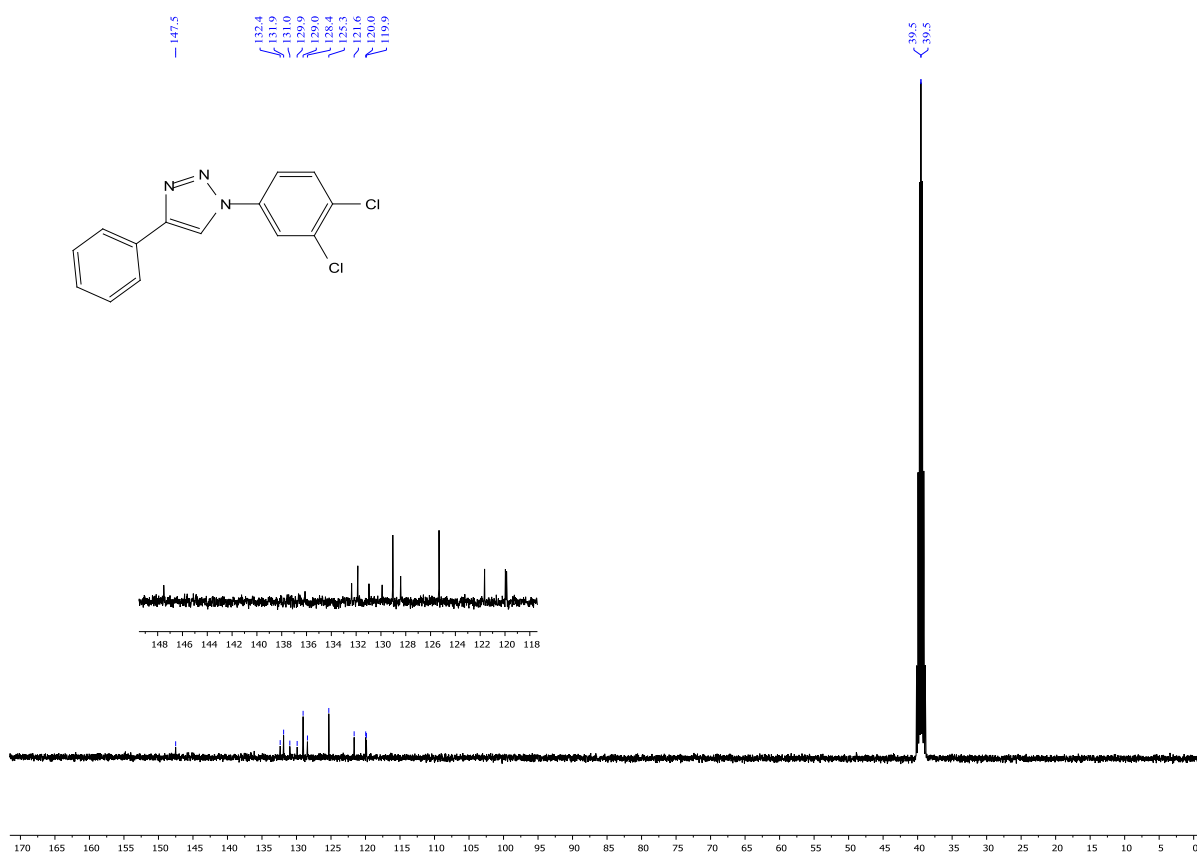

**Figure S17.** <sup>13</sup>C NMR (101 MHz, DMSO-*d*<sub>6</sub>) spectrum of 4-phenyl-1-(3,4-dichlorophenyl)-1*H*-1,2,3-triazole (**5**)

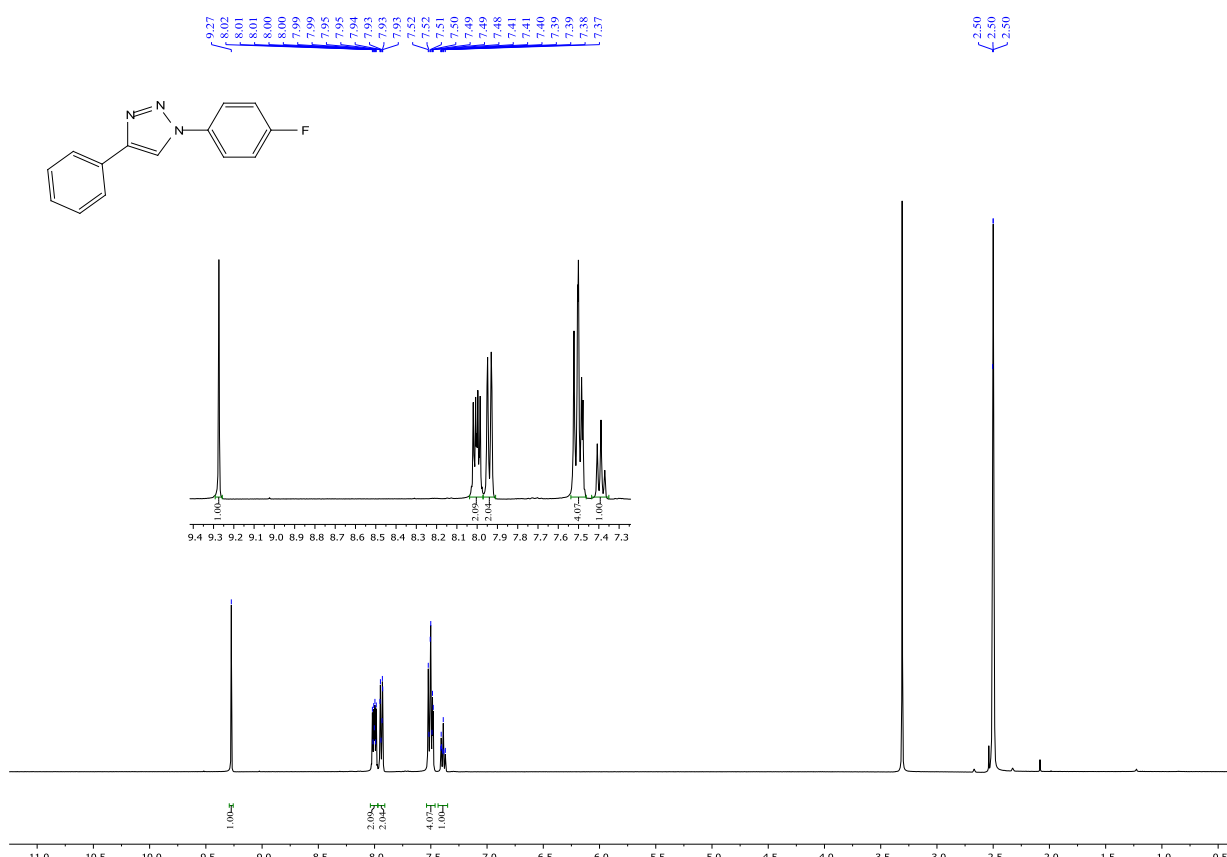

**Figure S18.** <sup>1</sup>H NMR (400 MHz, DMSO-*d*<sub>6</sub>) spectrum of 4-phenyl-1-(4-fluorophenyl)-1*H*-1,2,3-triazole (**6**)

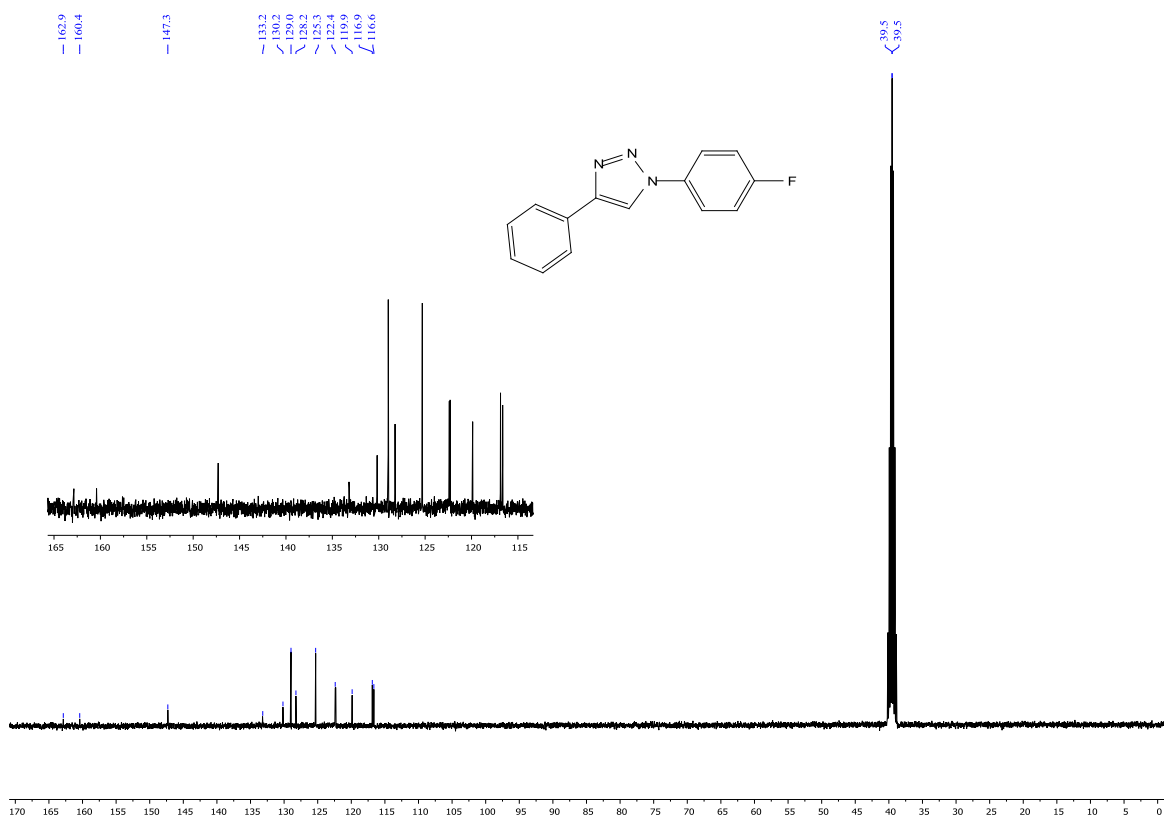

**Figure S19.** <sup>13</sup>C NMR (101 MHz, DMSO-*d*<sub>6</sub>) spectrum of 4-phenyl-1-(4-fluorophenyl)-1*H*-1,2,3-triazole (**6**)

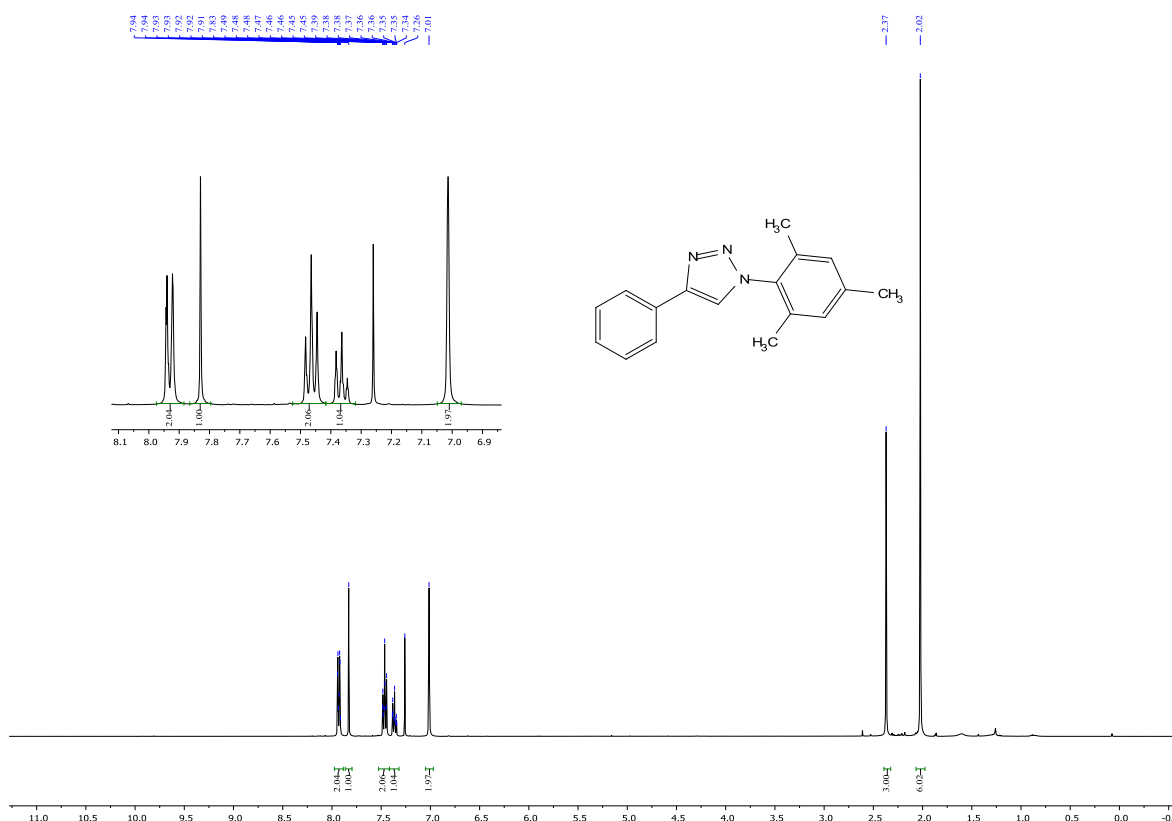

**Figure S20.** <sup>1</sup>H NMR (400 MHz, CDCl<sub>3</sub>) spectrum of 4-phenyl-1-(2,4,6-trimethylphenyl)-1H-1,2,3-triazole (**7**)

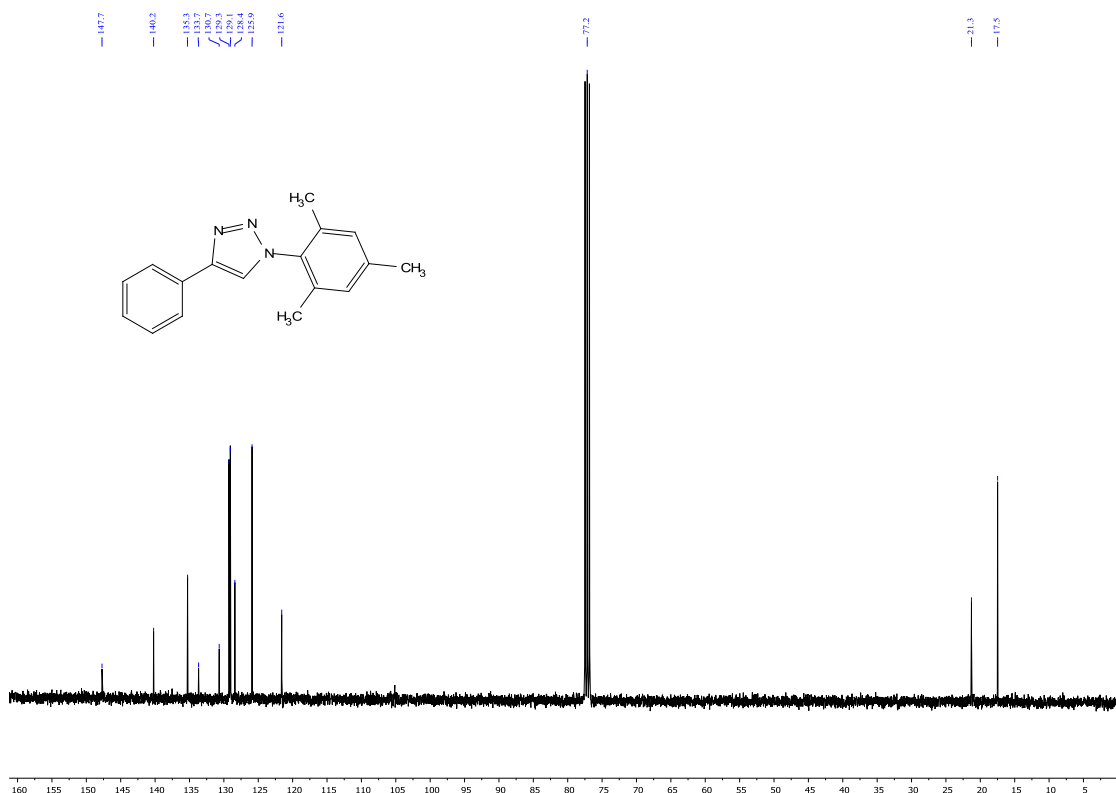

**Figure S21.** <sup>13</sup>C NMR (101 MHz, CDCl<sub>3</sub>) spectrum of 4-phenyl-1-(2,4,6-trimethylphenyl)-1H-1,2,3-triazole (**7**)



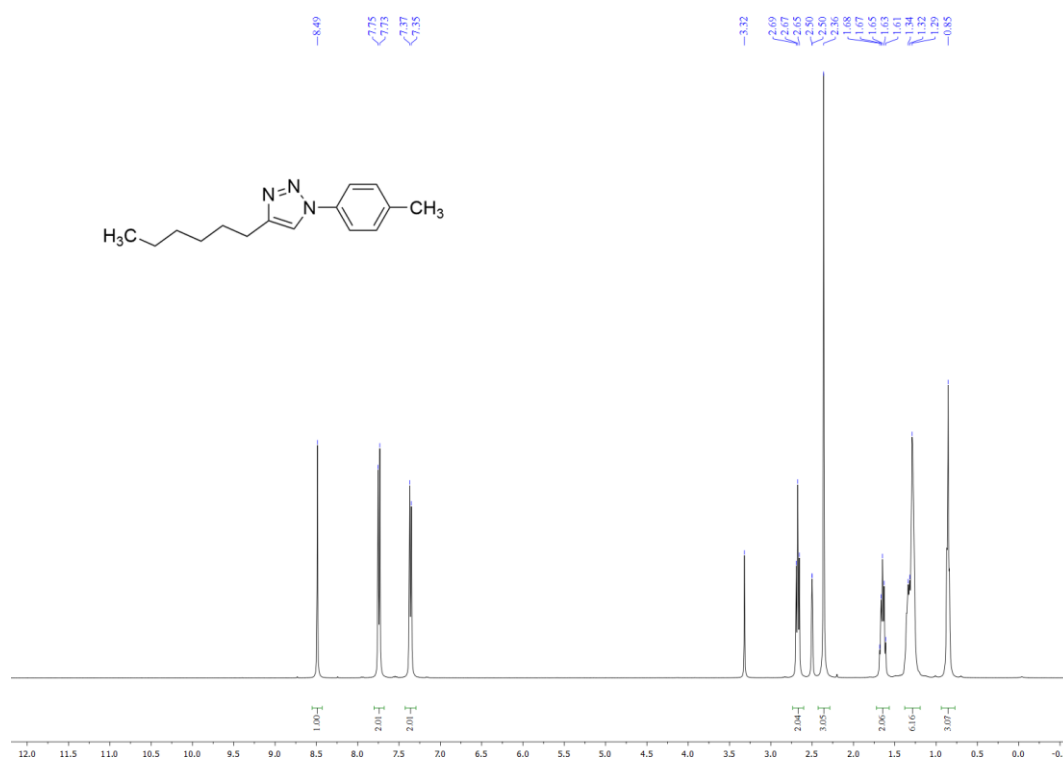

**Figure S24.** <sup>1</sup>H NMR (400 MHz, DMSO-*d*<sub>6</sub>) spectrum of 4-*n*-hexyl-1-(*p*-tolyl)-1*H*-1,2,3-triazole (9)

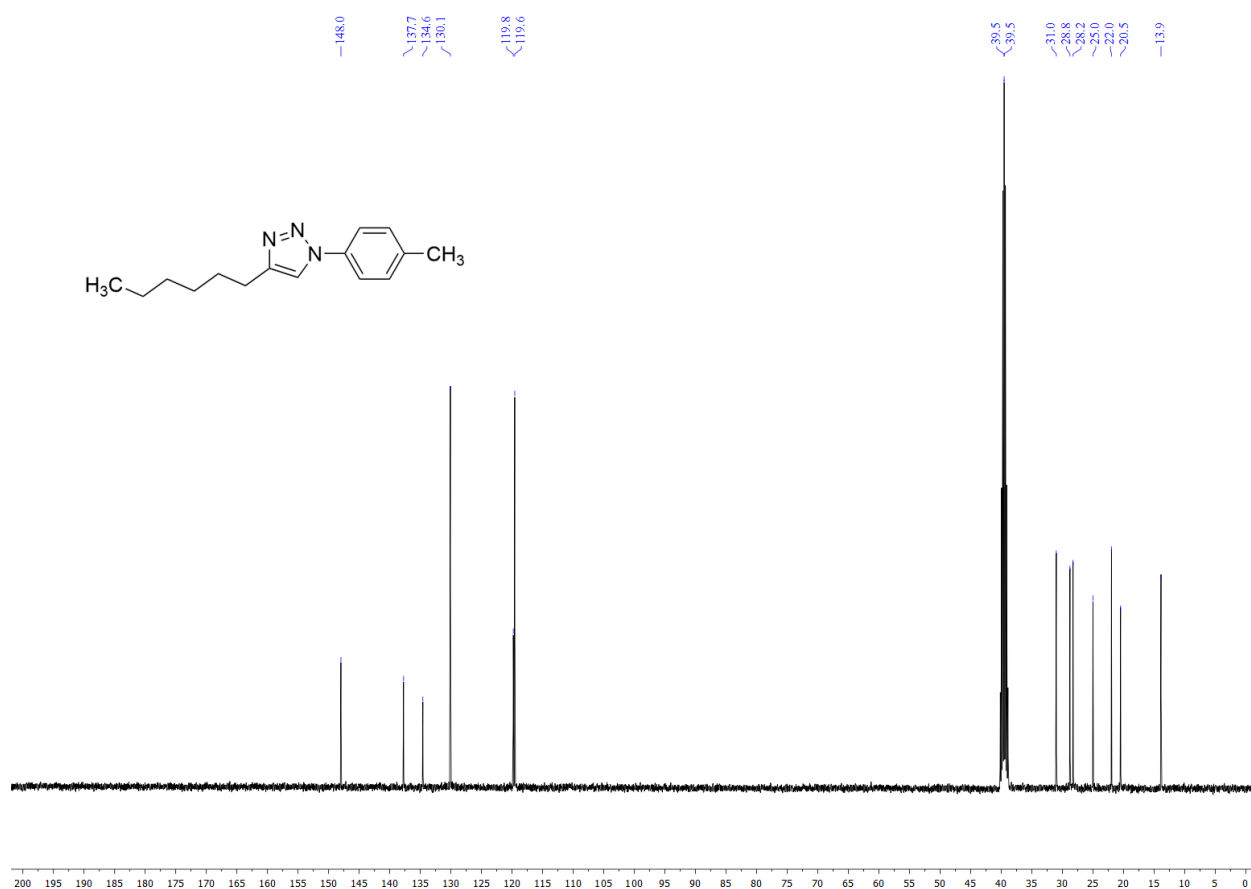

**Figure S25.** <sup>13</sup>C NMR (101 MHz, DMSO-*d*<sub>6</sub>) spectrum of 4-*n*-hexyl-1-(*p*-tolyl)-1*H*-1,2,3-triazole (9)

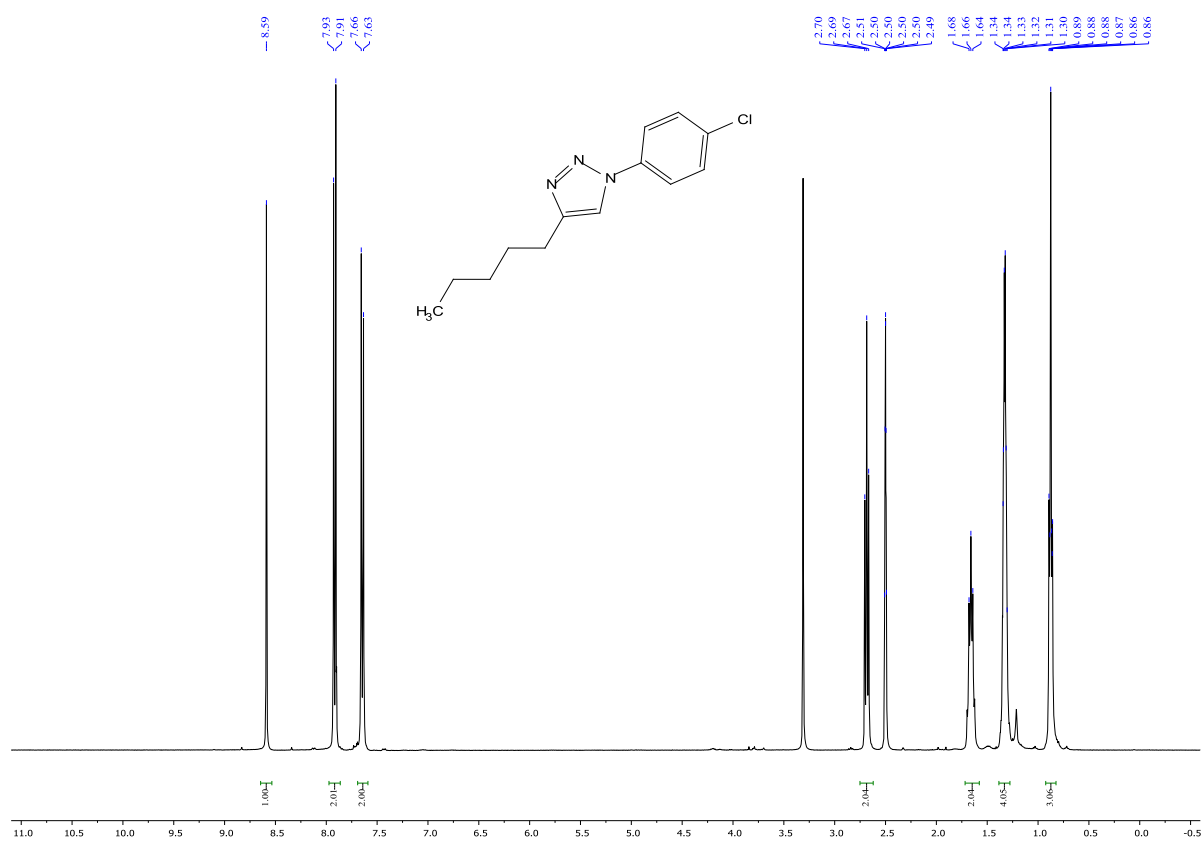

**Figure S26.** <sup>1</sup>H NMR (400 MHz, DMSO-*d*<sub>6</sub>) spectrum of 1-(4-chlorophenyl)-4-n-pentyl-1H-1,2,3-triazole (10)

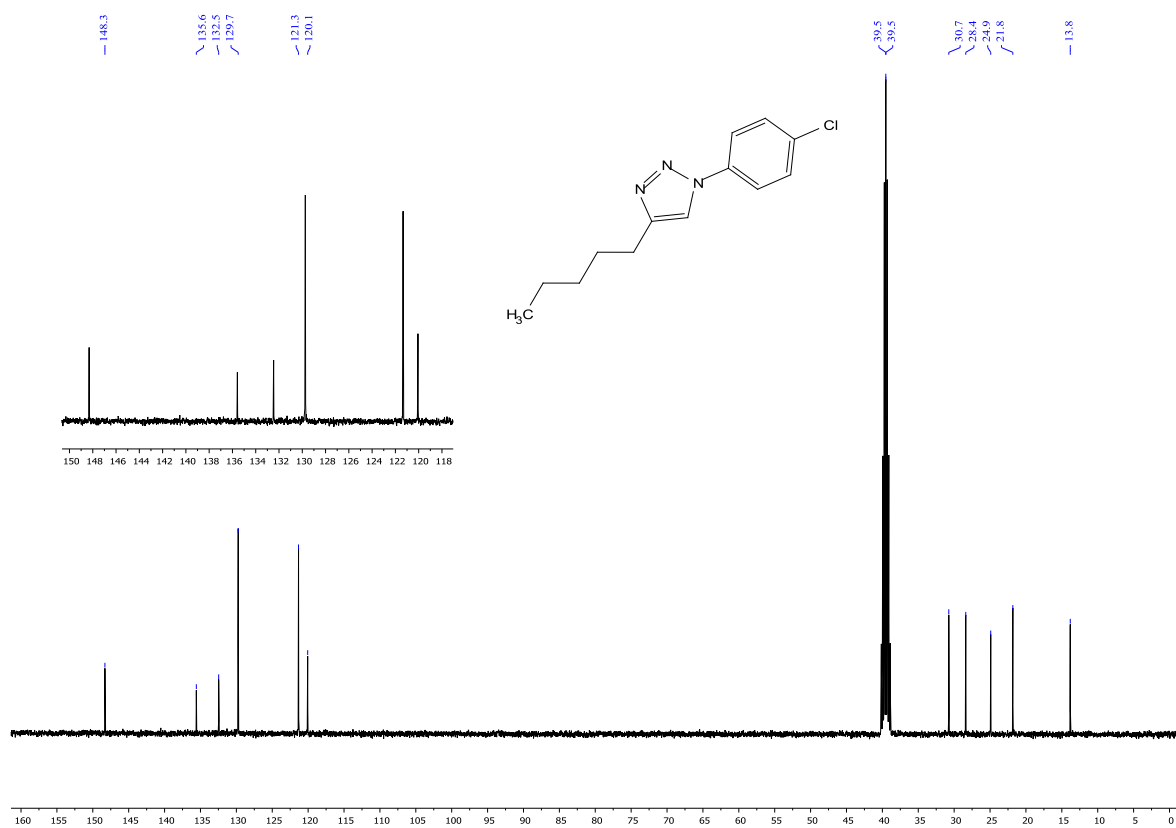

**Figure S27.** <sup>13</sup>C NMR (101 MHz, DMSO-*d*<sub>6</sub>) spectrum of 1-(4-chlorophenyl)-4-n-pentyl-1H-1,2,3-triazole (10)

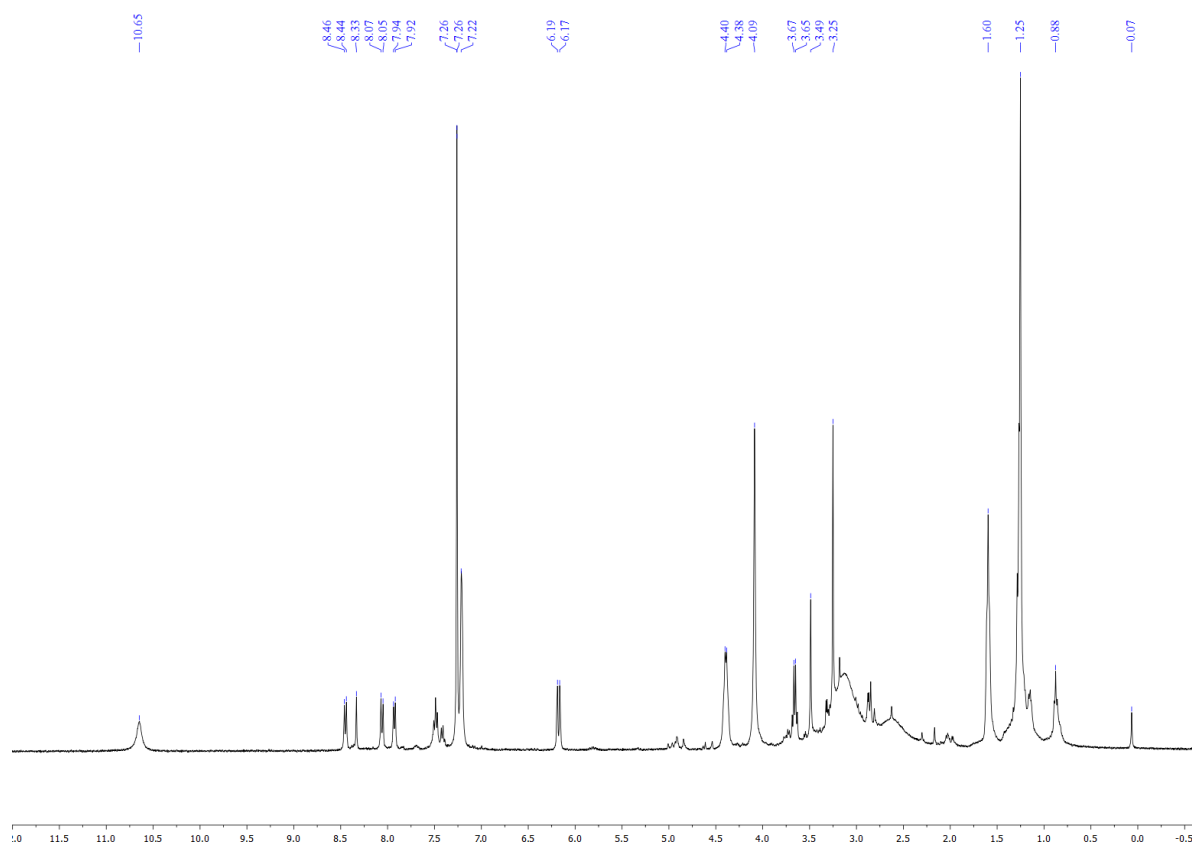

**Figure S28.** <sup>1</sup>H NMR (400 MHz, CDCl<sub>3</sub>) spectrum of 1-(4-nitrophenyl)-1H-1,2,3-triazole (**11**) after column chromatography (with some impurities from the reaction mixture; see the text).

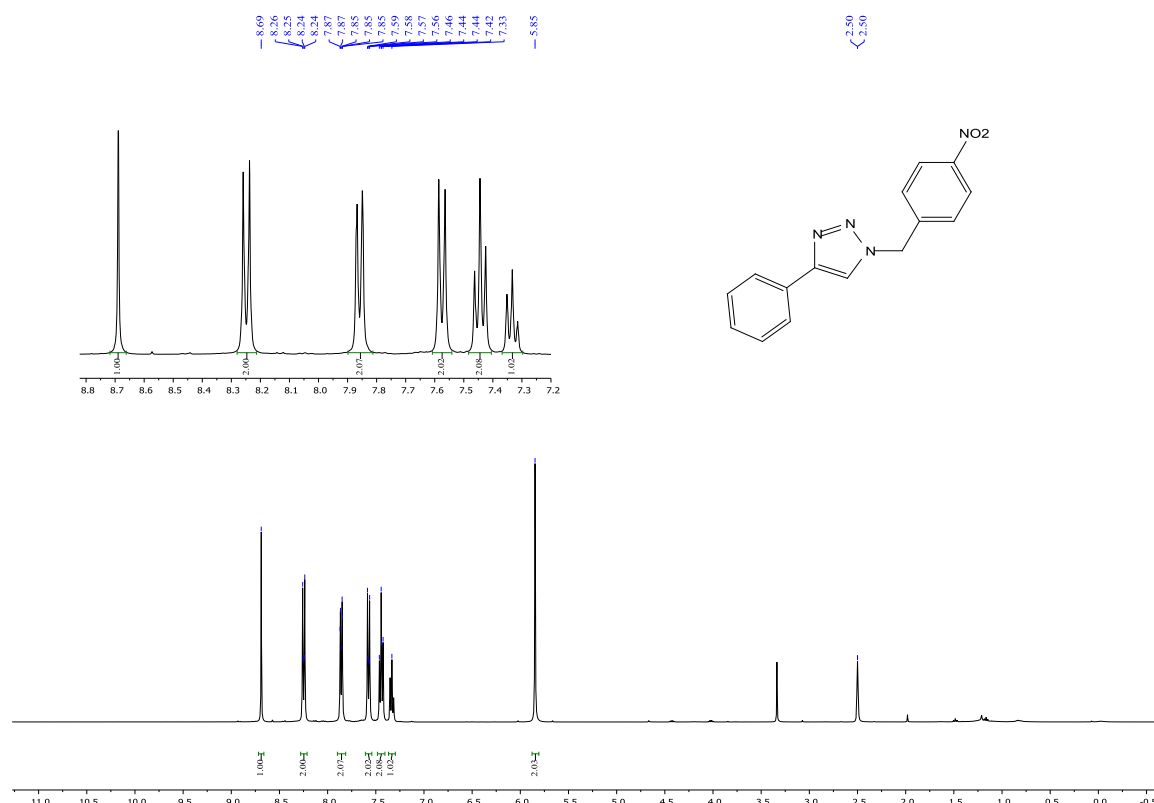

**Figure S29.** <sup>1</sup>H NMR (400 MHz, DMSO-*d*<sub>6</sub>) spectrum of 1-(4-nitrobenzyl)-4-phenyl-1H-1,2,3-triazole (**12**)

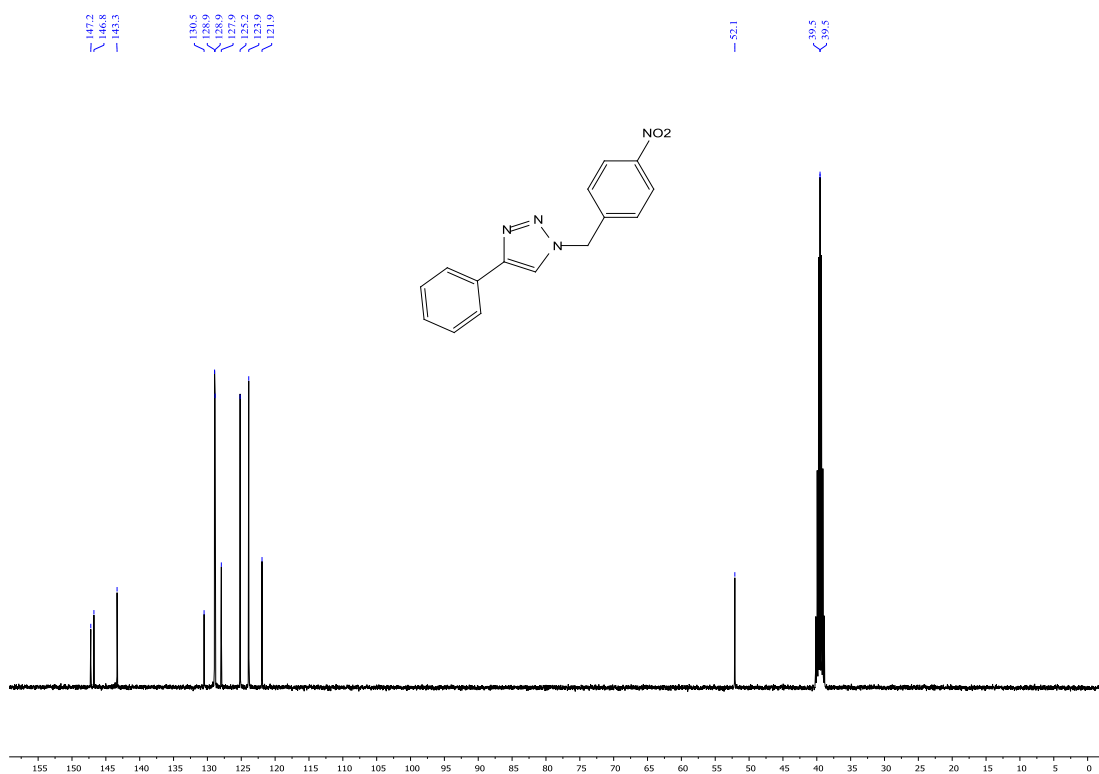

**Figure S30.** <sup>13</sup>C NMR (101 MHz, DMSO-*d*<sub>6</sub>) spectrum of 4-phenyl-1-(4-nitrobenzyl)-1*H*-1,2,3-triazole (**12**)

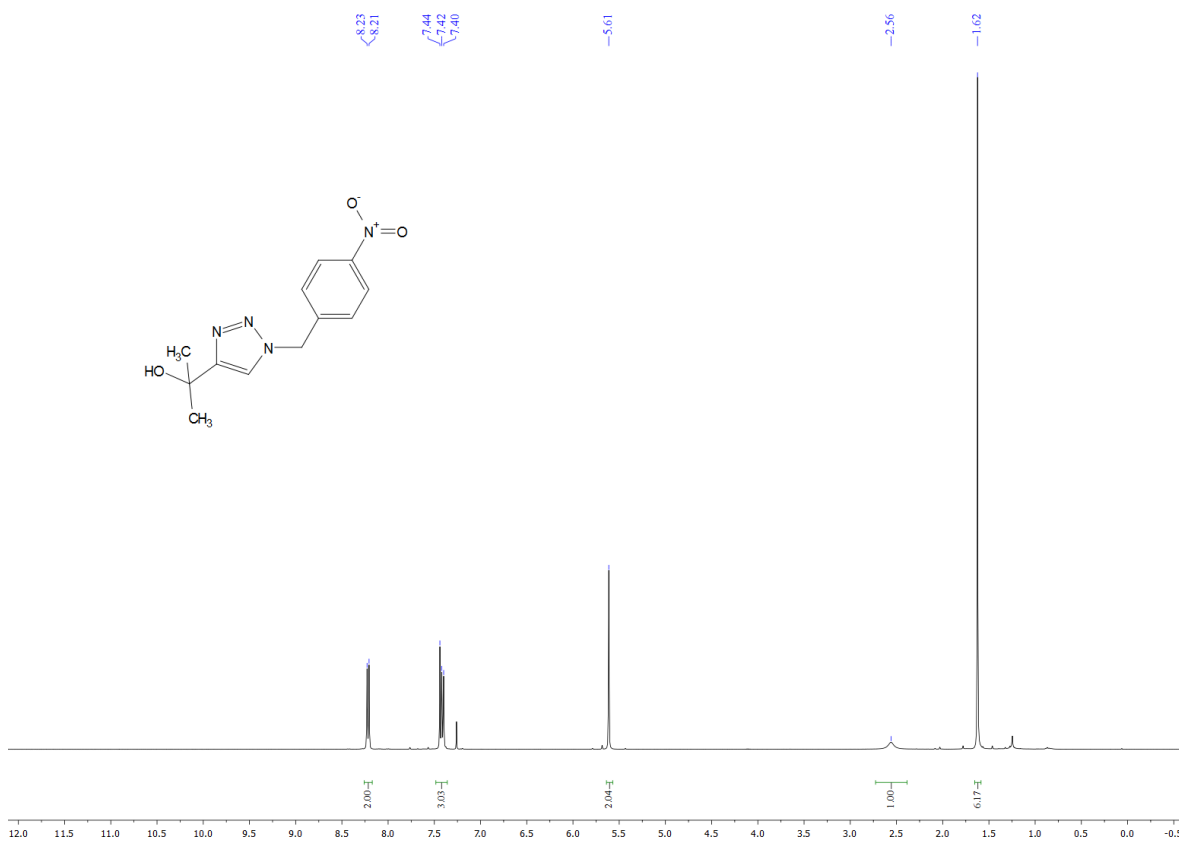

**Figure S31.** <sup>1</sup>H NMR (400 MHz, CDCl<sub>3</sub>) spectrum of 2-(1-(4-nitrobenzyl)-1*H*-1,2,3-triazol-4-yl)propan-2-ol (**13**)



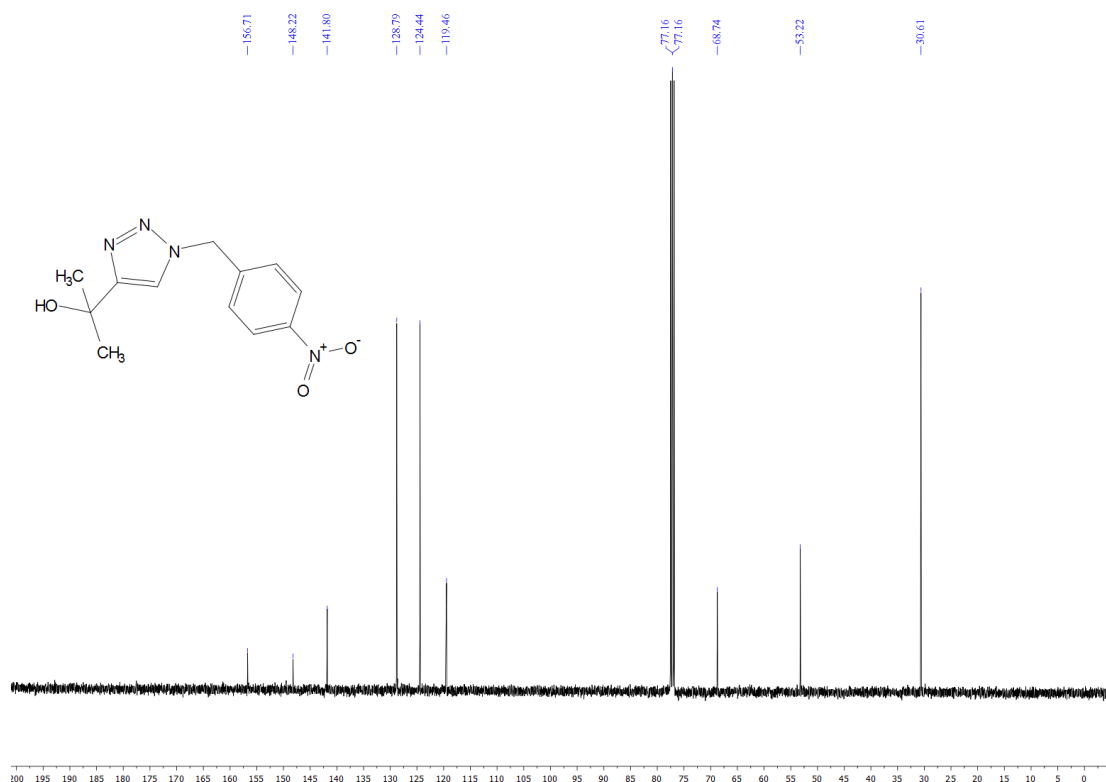

**Figure S32.** <sup>13</sup>C NMR (101 MHz, CDCl<sub>3</sub>) spectrum of 2-(1-(4-nitrobenzyl)-1H-1,2,3-triazol-4-yl)propan-2-ol (13)

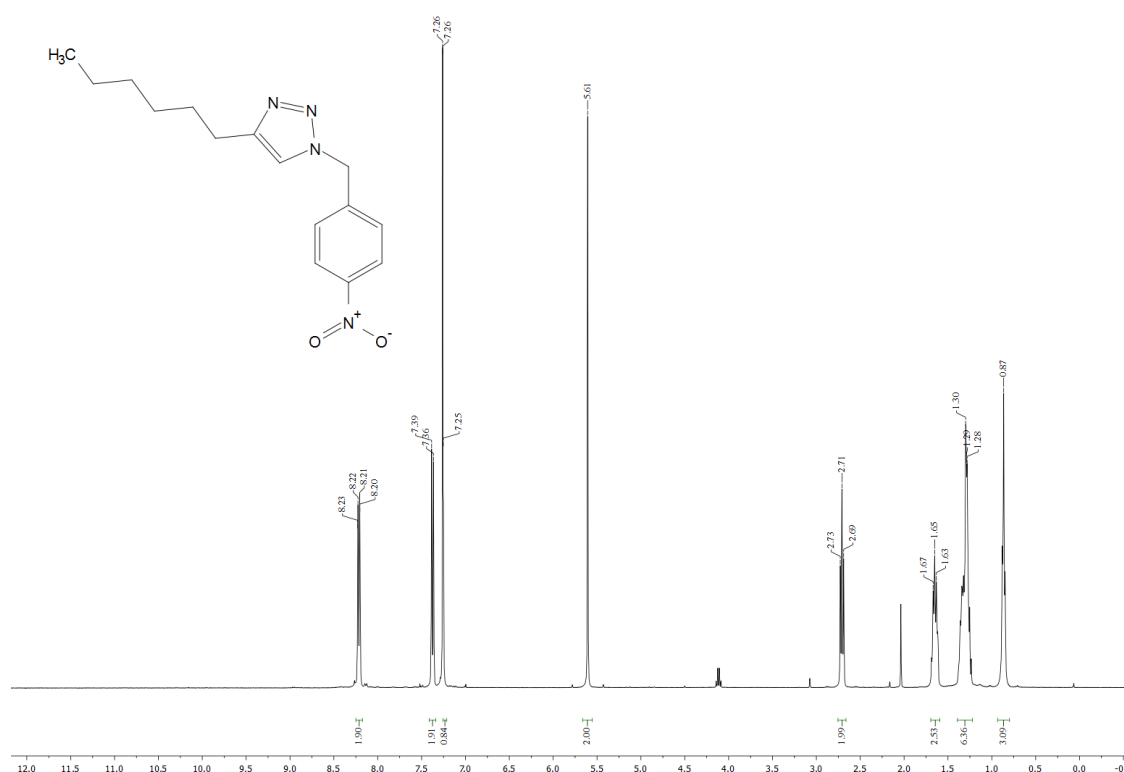

**Figure S33.** <sup>1</sup>H NMR (400 MHz, CDCl<sub>3</sub>) spectrum of 1-(4-nitrobenzyl)-4-hexyl-1H-1,2,3-triazole (14)

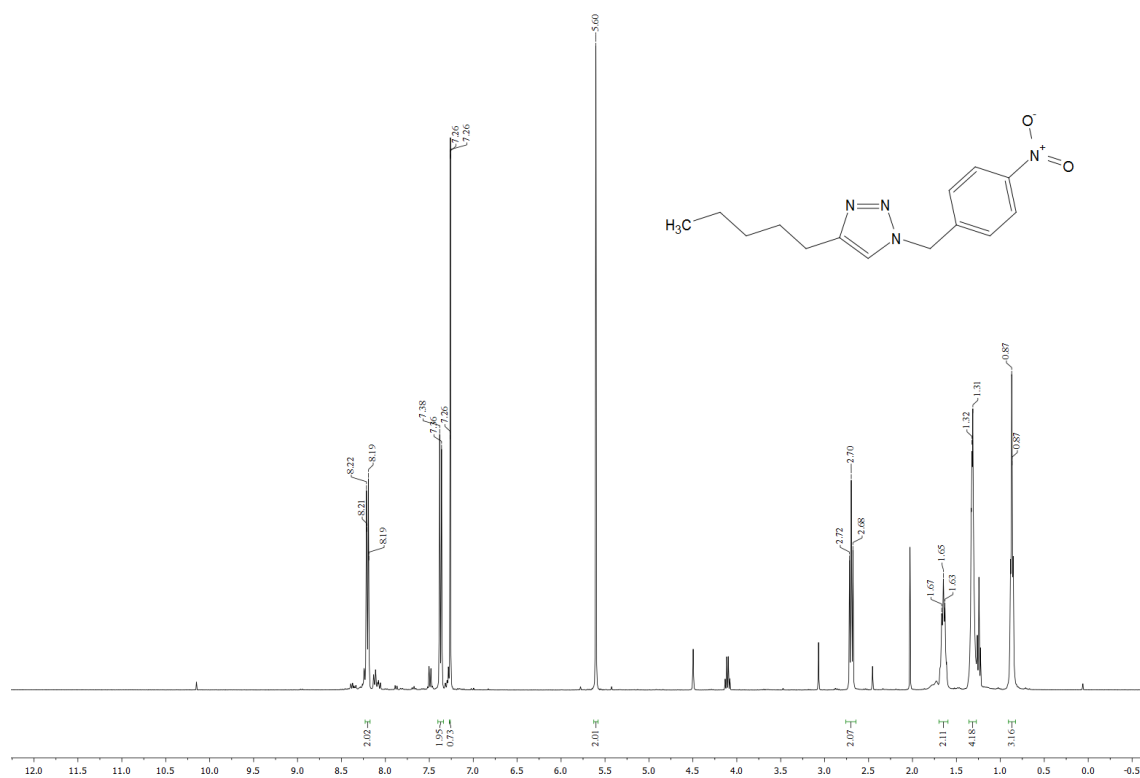

**Figure S34.** <sup>1</sup>H NMR (400 MHz, CDCl<sub>3</sub>) spectrum of 1-(4-nitrobenzyl)-4-pentyl-1H-1,2,3-triazole (**15**)

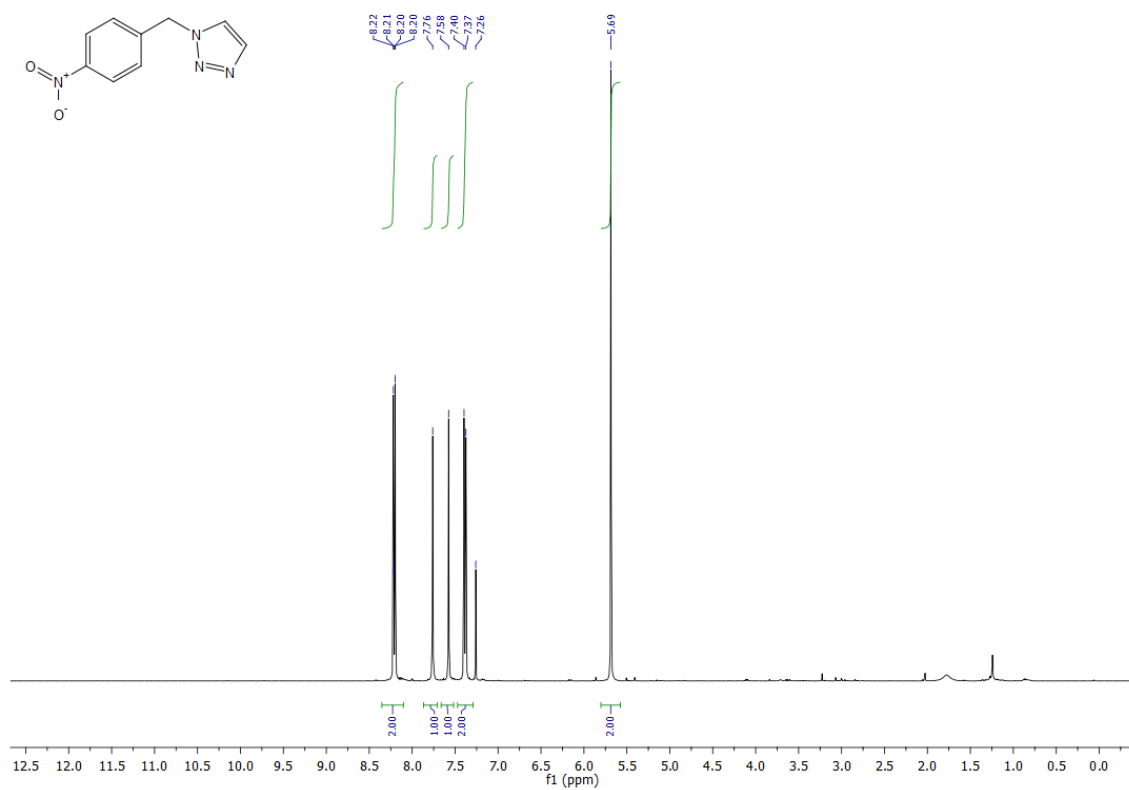

**Figure S35.** <sup>1</sup>H NMR (400 MHz, CDCl<sub>3</sub>) spectrum of 1-(4-nitrobenzyl)-1H-1,2,3-triazole (**16**).

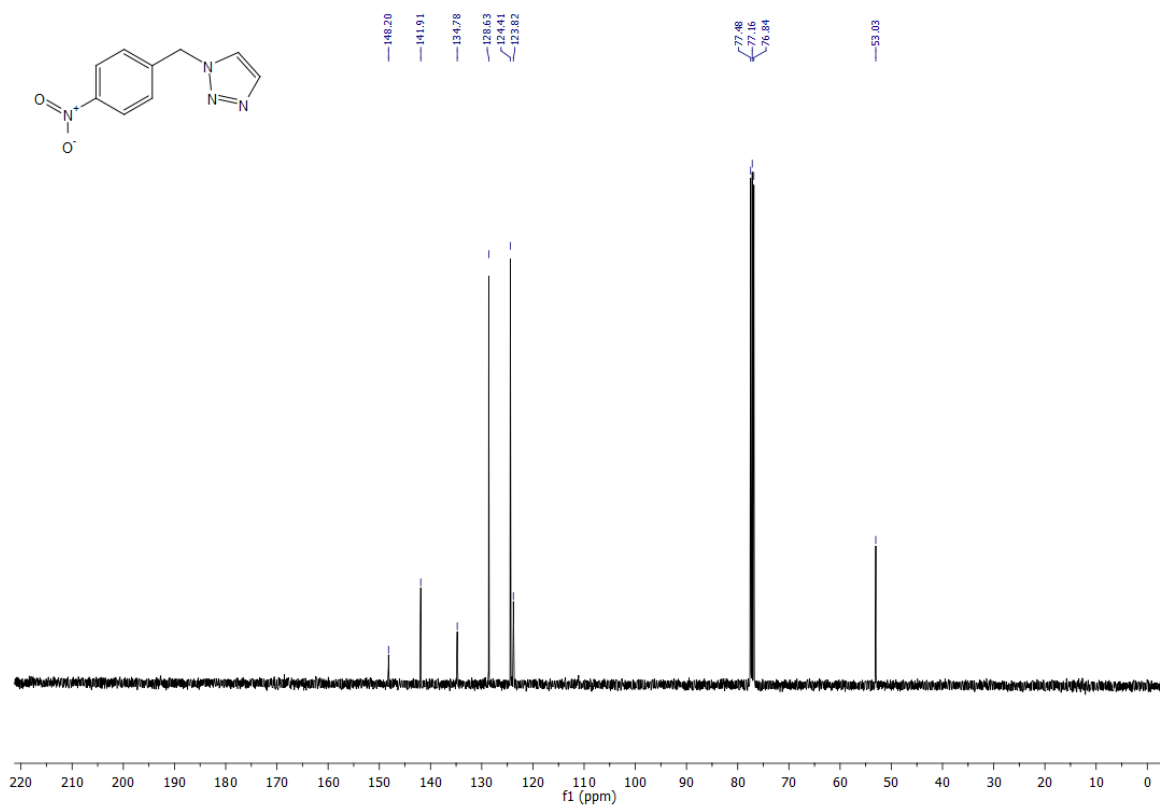

**Figure S36.**  $^{13}\text{C}$  NMR (101 MHz,  $\text{CDCl}_3$ ) spectrum of 1-(4-nitrobenzyl)-1H-1,2,3-triazole (**16**).

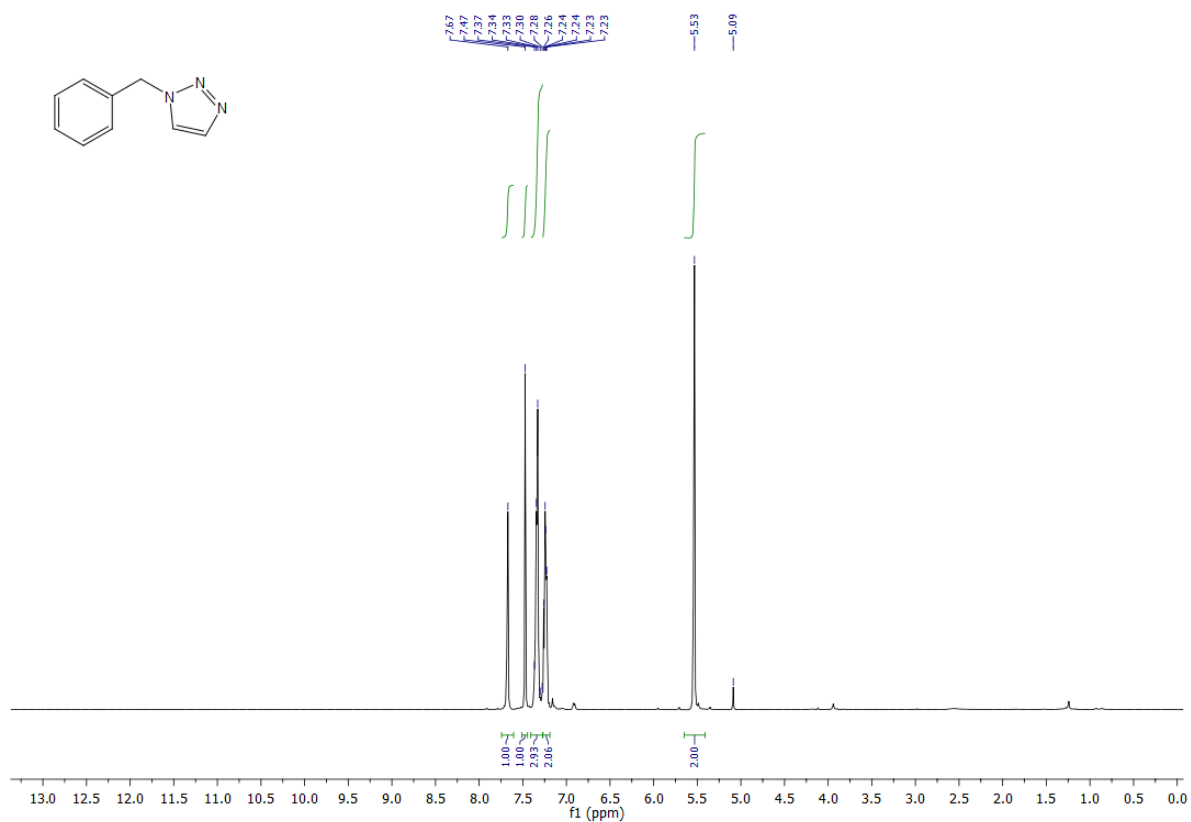

**Figure S37.**  $^1\text{H}$  NMR (400 MHz,  $\text{CDCl}_3$ ) spectrum of 1-benzyl-1H-1,2,3-triazole (**17**).

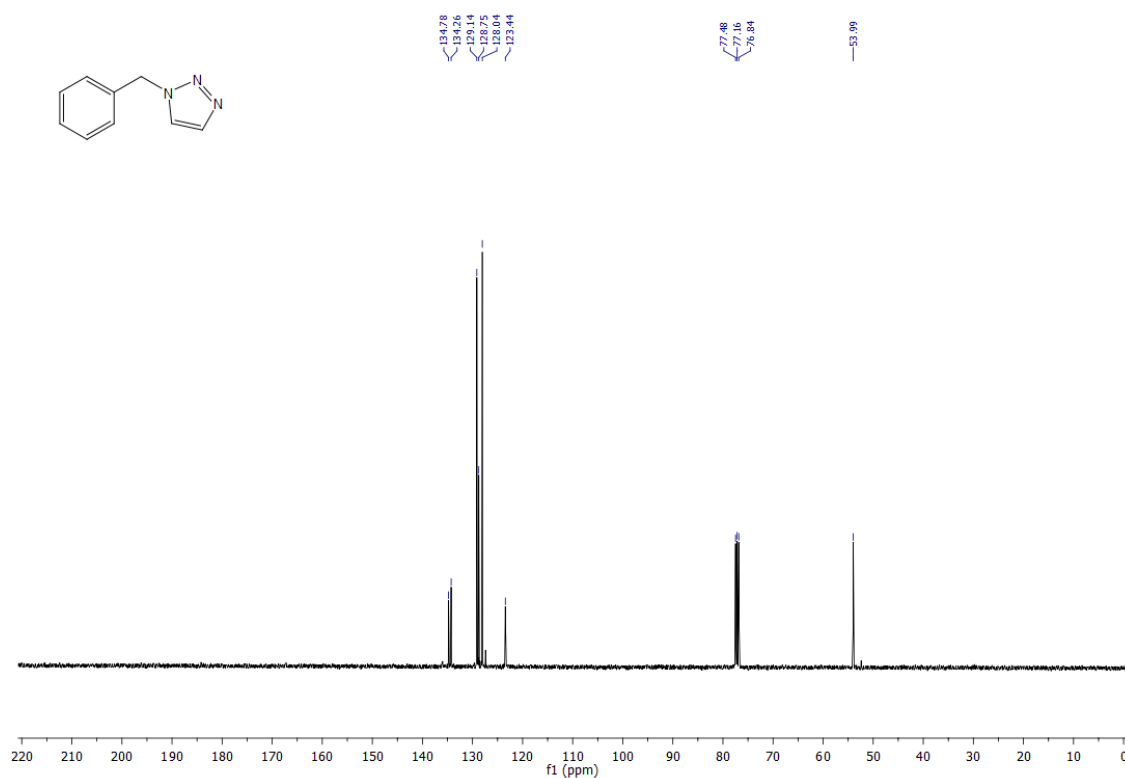

**Figure S38.**  $^{13}\text{C}$  NMR (101 MHz,  $\text{CDCl}_3$ ) spectrum of 1-benzyl-1H-1,2,3-triazole (**17**).

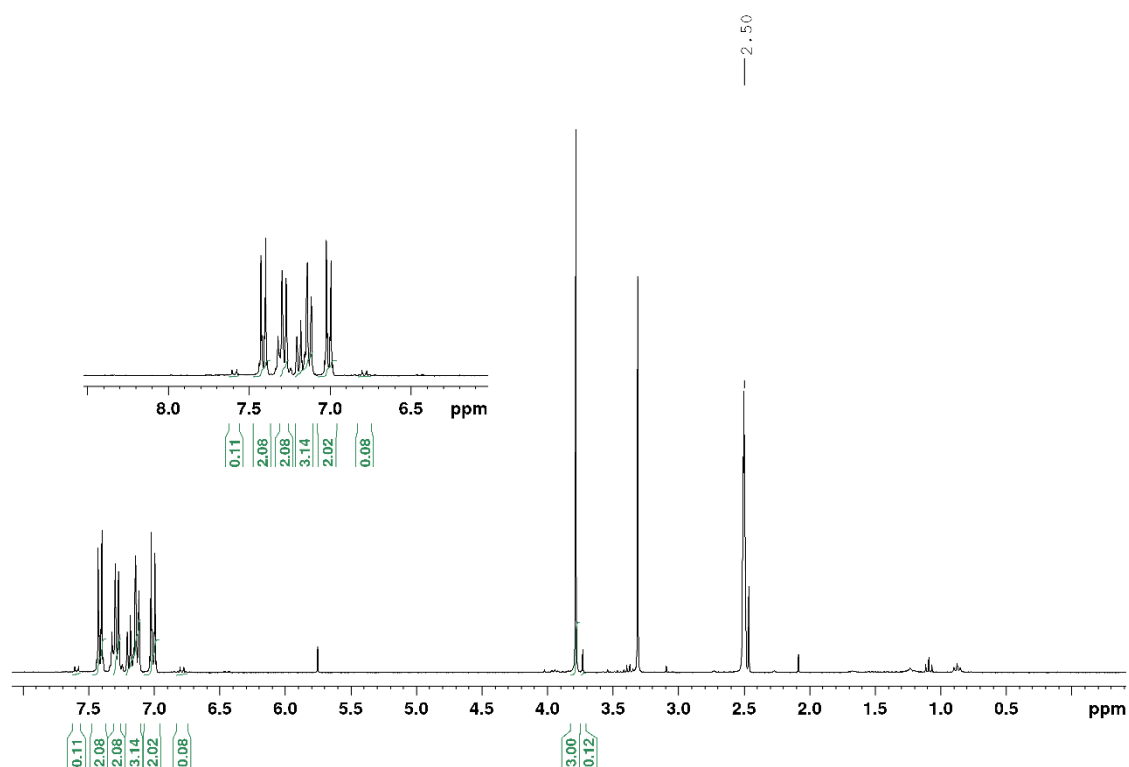

**Figure S39.**  $^1\text{H}$  NMR (300 MHz,  $\text{DMSO}-d_6$ ) spectrum of the reaction mixture after C-S cross-coupling between thiophenol and 4-iodanisole, extracted from IL medium (**18**). Residual water appears as a singlet at 3.31 ppm.

## S5. XRD data

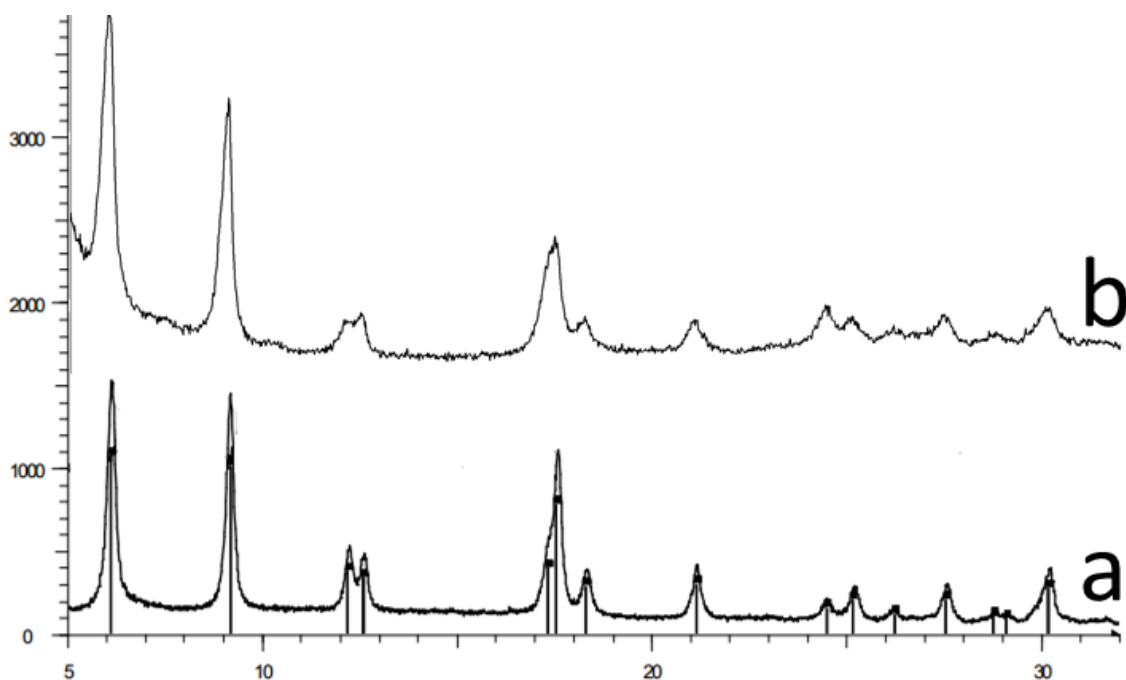

**Figure S40.** XRD data of copper phenylacetylenide at literature source (a) and this work (b)

**Table S6:** XRD data for copper phenylacetylenide obtained

| No. | 2-theta(deg) | d(ang.)    |
|-----|--------------|------------|
| 1   | 6.068(5)     | 14.554(12) |
| 2   | 9.120(5)     | 9.689(5)   |
| 3   | 12.15(2)     | 7.281(14)  |
| 4   | 12.535(12)   | 7.056(7)   |
| 5   | 17.500(8)    | 5.064(2)   |
| 6   | 18.245(15)   | 4.859(4)   |
| 7   | 21.02(2)     | 4.223(4)   |
| 8   | 24.42(2)     | 3.642(3)   |
| 9   | 25.05(3)     | 3.552(4)   |
| 10  | 26.12(5)     | 3.409(6)   |
| 11  | 26.74(11)    | 3.331(14)  |
| 12  | 27.45(2)     | 3.246(2)   |
| 13  | 28.81(5)     | 3.096(5)   |
| 14  | 30.12(3)     | 2.964(2)   |

## S6. SEM data

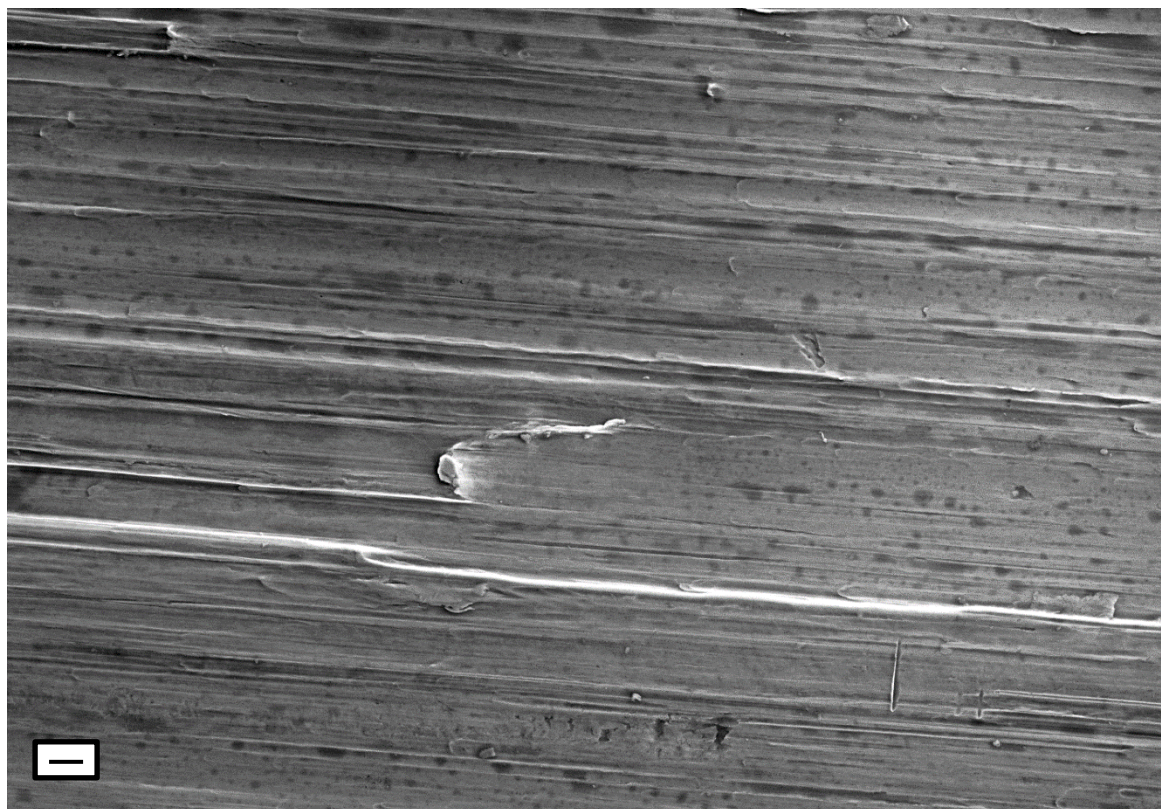

**Figure S41.** SEM image of a copper electrode after treatment with HCl and electrochemical dissolution. Scale bar 20  $\mu\text{m}$ .

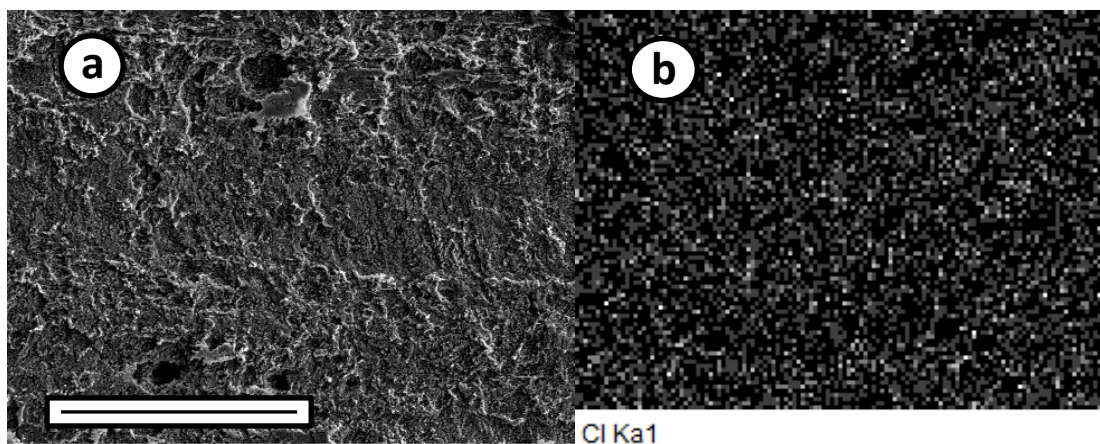

**Figure S42.** SEM image of a copper electrode after treatment with HCl and electrochemical dissolution process (a), scale bar 30 $\mu\text{m}$ ; EDS chlorine atoms map on the same copper electrode surface (b).

**Table S7.** Elemental analysis of the copper electrode surface (Figure S42, a).

| Elemental<br>analysis | <b>O,<br/>%</b> | <b>Si,<br/>%</b> | <b>Cl,<br/>%</b> | <b>Cu,<br/>%</b> | <b>Total,<br/>mas.%</b> |
|-----------------------|-----------------|------------------|------------------|------------------|-------------------------|
|                       | 1.28            | 0.10             | 0.04             | 98.58            | 100.00                  |

The presence of oxygen in the sample can be explained by the oxidation of copper from the electrode surface with atmospheric oxygen. The presence of silicon is possible as a result of mechanical treatment of the original electrode with an abrasive.

## S7. HRESI-MS data

**Table S8.** HRESI-MS data.

| Structure                                                                         | Formula                                           | [M] <sup>+</sup> (found) | [M] <sup>+</sup> (calculated) |
|-----------------------------------------------------------------------------------|---------------------------------------------------|--------------------------|-------------------------------|
| 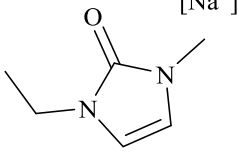 | C <sub>6</sub> H <sub>10</sub> ON <sub>2</sub> Na | 149.0690                 | 149.0691                      |

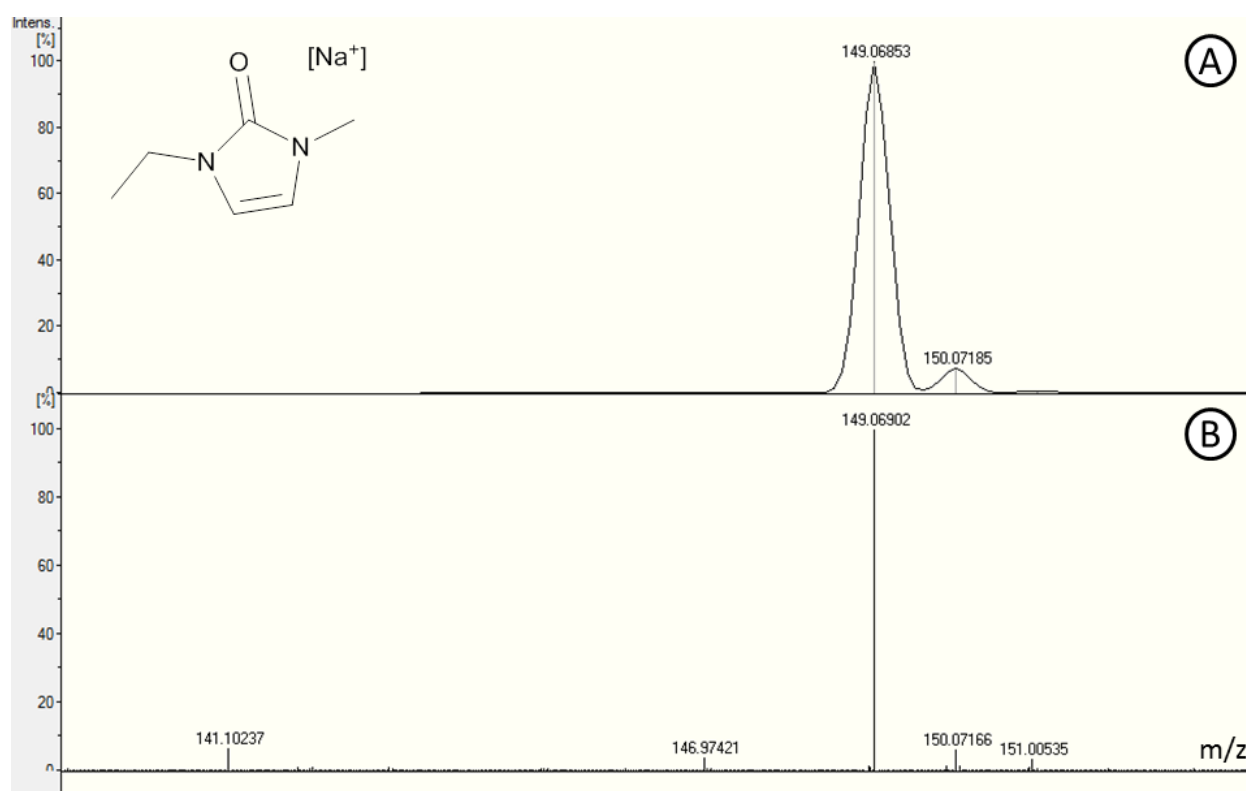

**Figure S43.** HRESI-MS spectra of molecular ion for the azolone C<sub>6</sub>H<sub>10</sub>ON<sub>2</sub>Na. A. Calculated; B. Found



### S8. Single crystal X-ray structure determination

Appropriate crystals of **19** and **20** were obtained from the reaction mixture in the IL according to the procedure reported in the related manuscript. Then, a suitable crystal was selected and placed on a diffractometer. The crystal was kept at 100(2) K during data collection. Using Olex2 [1], the structure was solved with the ShelXS [2] structure solution program using Direct Methods and refined with the ShelXL [3] refinement package using CGLS minimization.

1. O. V. Dolomanov, L. J. Bourhis, R. J. Gildea, J. A. K. Howard and H. Puschmann, OLEX2: a complete structure solution, refinement and analysis program. *J. Appl. Cryst.* (2009). 42, 339-341.
2. SHELXS, G.M. Sheldrick, *Acta Cryst.* (2008). A64, 112-122
3. SHELXL, G.M. Sheldrick, *Acta Cryst.* (2008). A64, 112-122

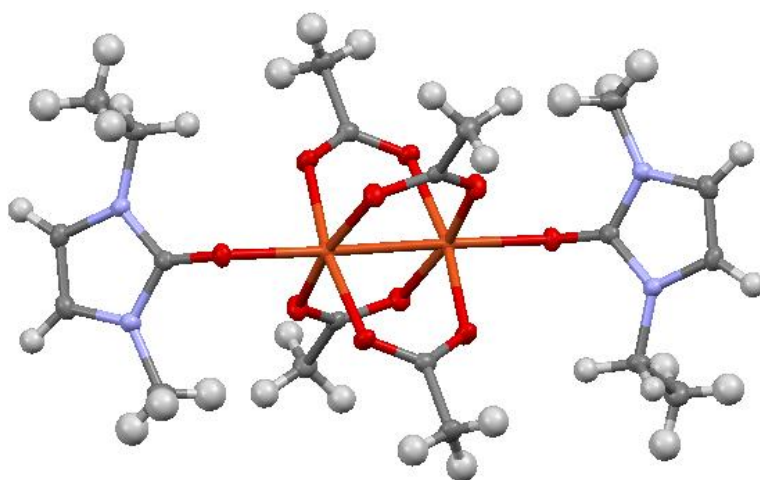

**Figure S44.** Crystal structure of the complex **19**<sup>1</sup>.

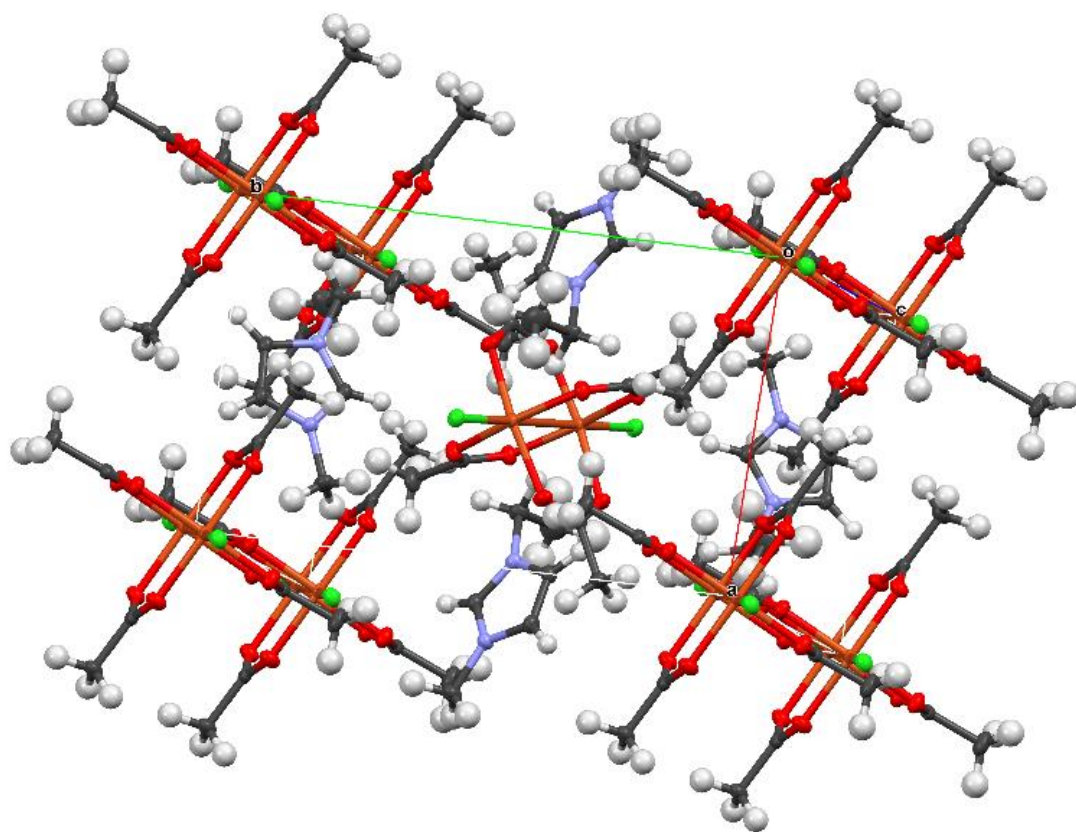

**Figure S45.** Crystal structure of the complex **20<sup>2</sup>**.

## S9. Details on electrochemical experiments

For the electrochemical experiments ElectraSyn device was used (by IKA). All the electrodes are commercially available (working electrodes, reference electrode and counter electrodes).

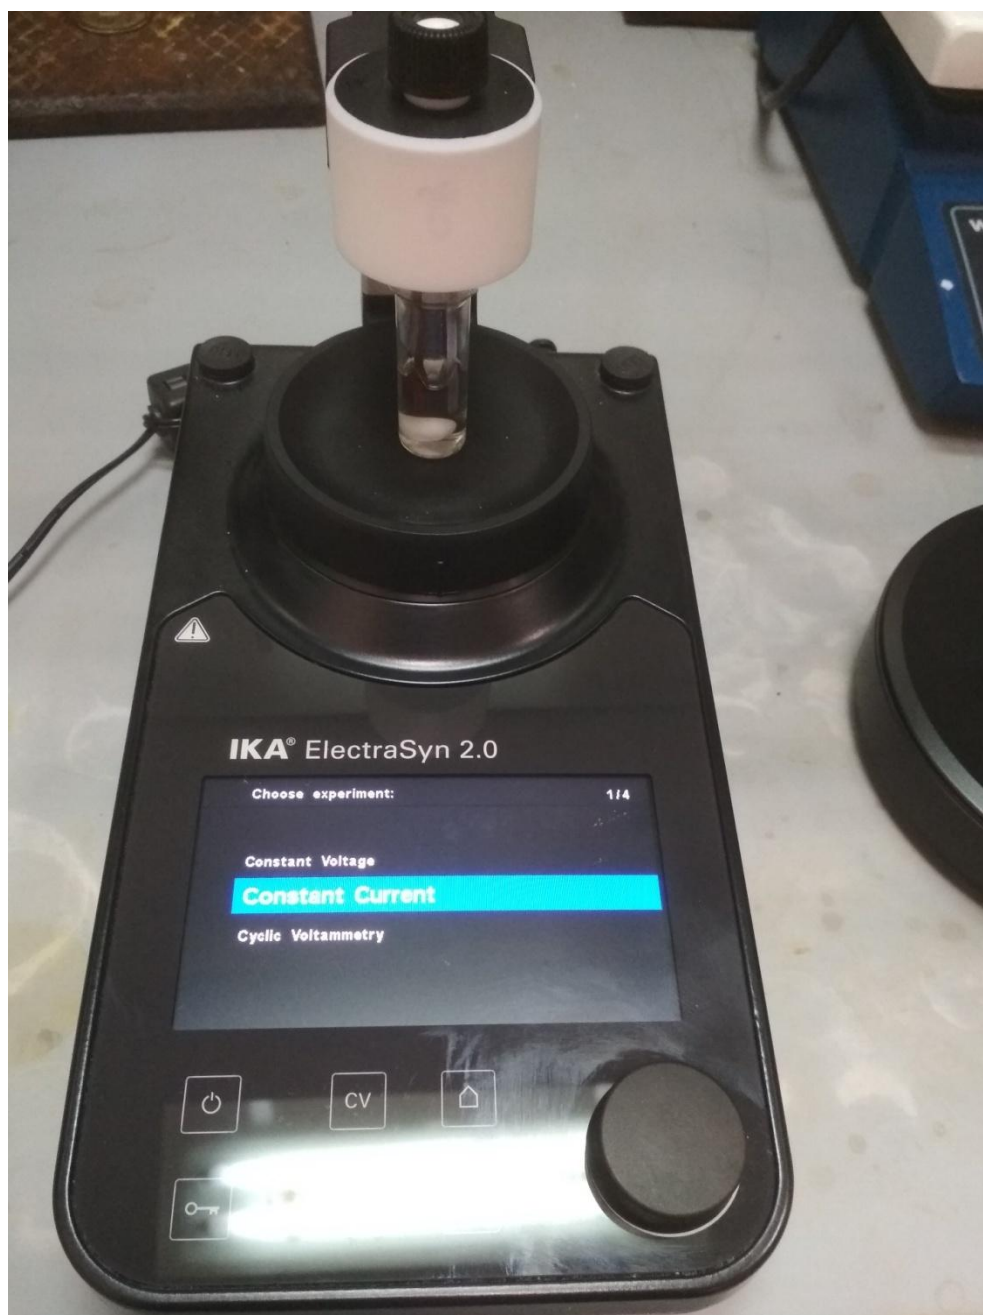

**Figure S46.** IKA ElectraSyn 2.0 device before experiments.

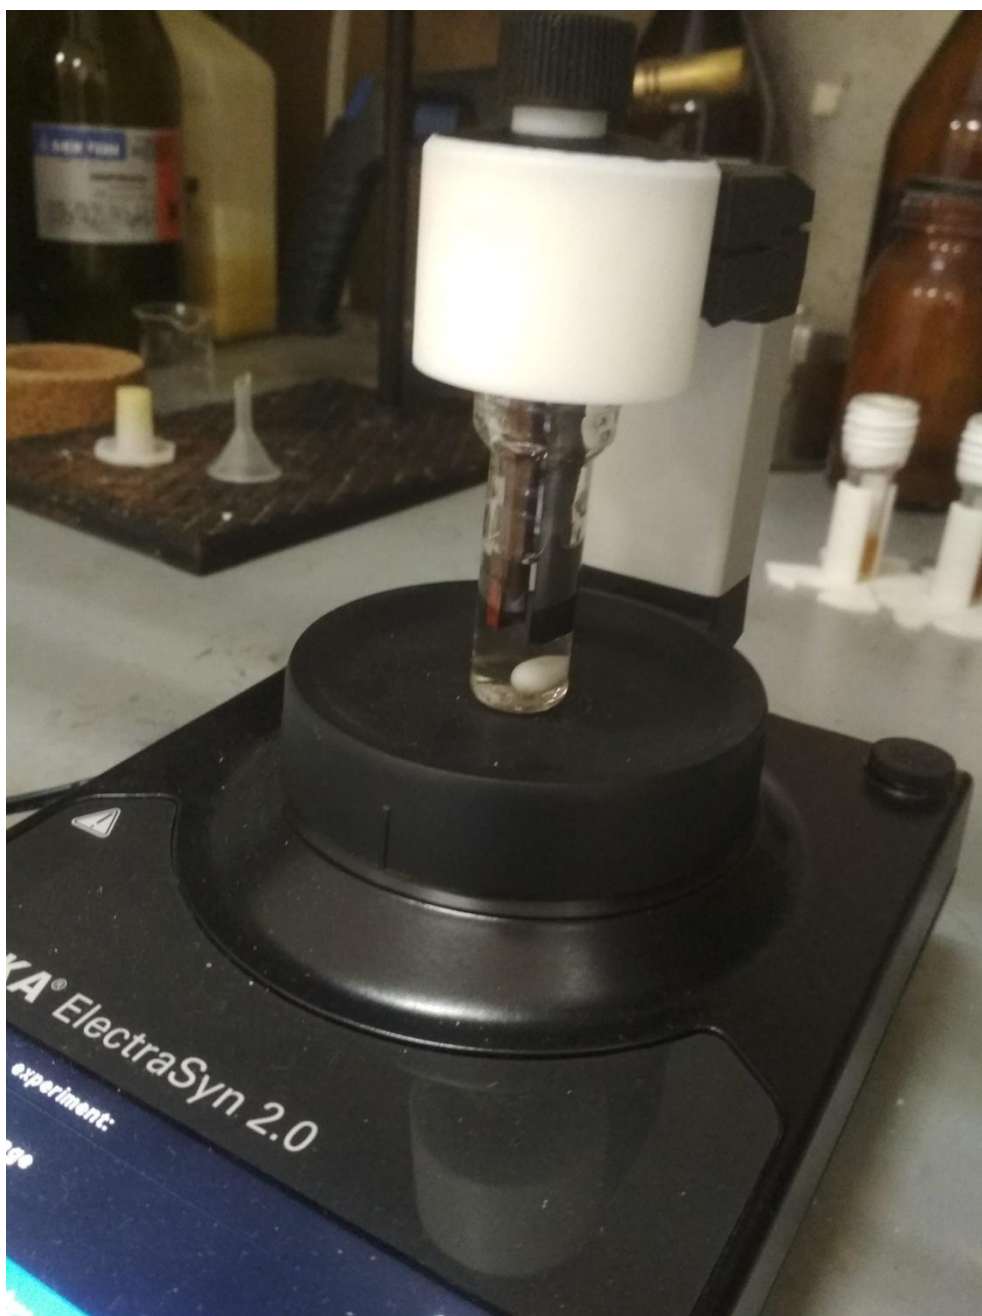

**Figure S47.** ElectraSyn device equipped with a single vial with two standard electrodes.

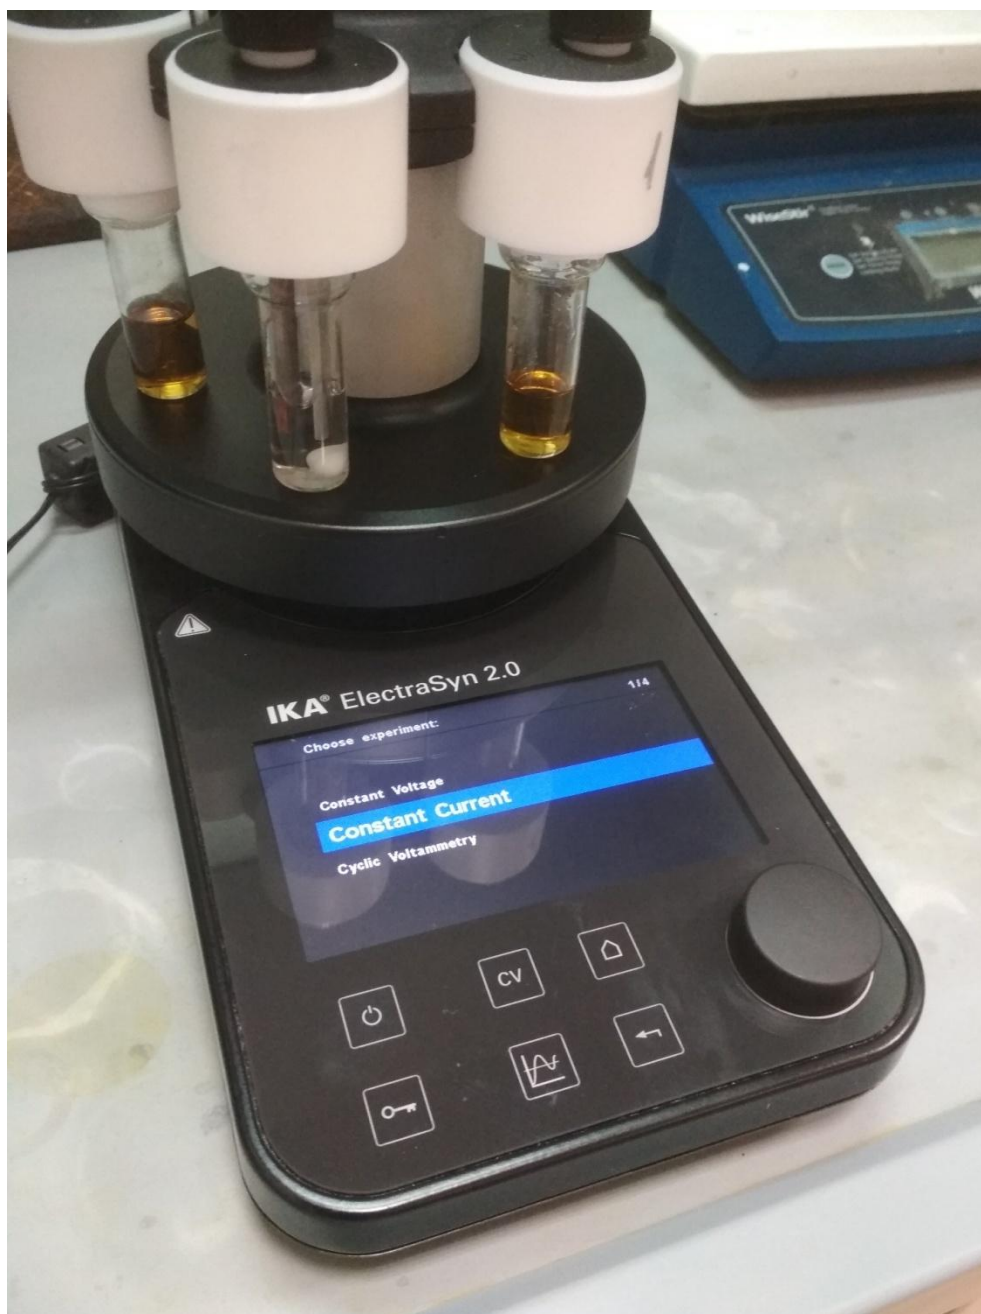

**Figure S49.** ElectraSyn apparatus equipped with a carousel.



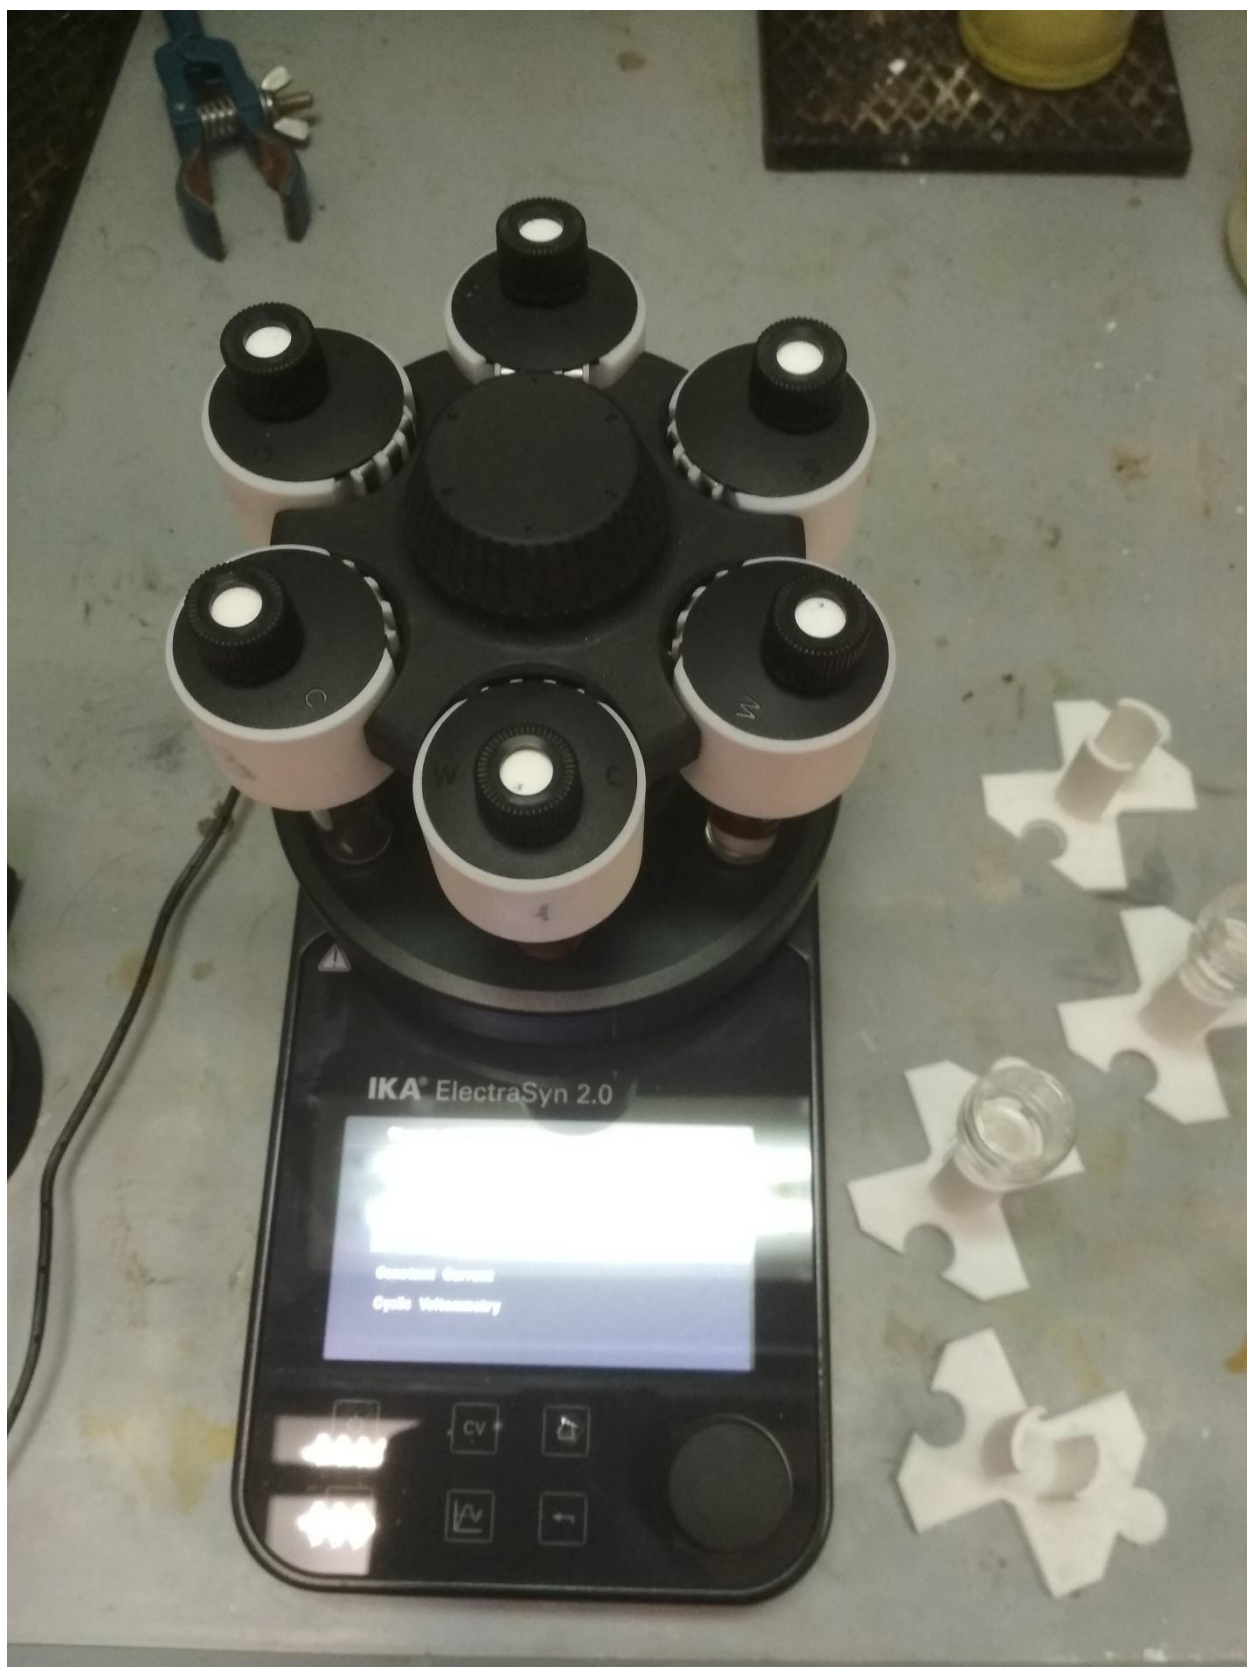

**Figure S50.** ElectraSyn apparatus equipped with a carousel.

## S10. References

1. V. G. Shtyrin, N. Y. Serov, D. R. Islamov, A. L. Konkin, M. S. Bukharov, O. I. Gnezdilov, D. B. Krivolapov, O. g. N. Kataeva, G. A. Nazmutdinova and F. Wendler, *Dalton Trans.*, 2014, **43**, 799-805.
2. N. Y. Serov, V. G. Shtyrin, D. R. Islamov, O. N. Kataeva and D. B. Krivolapov, *Acta Crystallographica Section E*, 2018, **74**, 981-986.
